# Supplementary material
Source: Research Square preprint supplement (doi:10.21203/rs.3.rs-9942483/v1)

## 1 **Supplementary figure legends**

### 2 **Supplementary Fig.1: Loss of *Irf8* recapitulates a chronic-phase CML-like** 3 **phenotype with inflammatory niche remodeling**

4 (A) Peripheral blood counts of *Irf8*<sup>+/+</sup>, *Irf8*<sup>+d</sup> and *Irf8*<sup>d/d</sup> mice. (B) Frequencies of  
5 circulating immune cell subsets in peripheral blood, determined by flow cytometry. (C,  
6 D) Frequencies of immune cells in bone marrow (C) and spleen (D), determined by  
7 flow cytometry. (E, F) Frequencies of erythroid lineage cells in bone marrow (E) and  
8 spleen (F), determined by flow cytometry. (G, H) Frequencies of hematopoietic stem  
9 and progenitor cells in the bone marrow (G) and spleen (H), determined by flow  
10 cytometry. (I) Quantification of spleen weight, demonstrating significant splenomegaly  
11 in *Irf8*<sup>d/d</sup> mice compared with *Irf8*<sup>+/+</sup> and *Irf8*<sup>+d</sup> mice. (J) Representative nearest-  
12 neighbor analysis plots of megakaryocytes in bone marrow and spleen. 200  $\mu$ m = 395  
13 pixels. (K,L) Quantification of nearest-neighbour megakaryocyte inter-cell distance (K)  
14 and megakaryocyte number per cluster (L) in bone marrow and spleen, confirming  
15 increased megakaryocyte density and clustering in *Irf8*<sup>d/d</sup> mice normalised to tissue  
16 area. (M) Immunofluorescence staining of collagen fibers (yellow), Sca-1<sup>+</sup> stromal cells  
17 (turquoise), Endomucin<sup>+</sup> vessels (pink) in bone marrow of *Irf8*<sup>+/+</sup> (left) and *Irf8*<sup>d/d</sup> (right)  
18 mice. Scale bar: 20  $\mu$ m.

19

### 20 **Supplementary Fig. 2: *Irf8* deficiency drives compartment-specific stromal** 21 **remodeling in bone marrow and spleen.**

22 (A) Flow cytometric analysis of CD45<sup>-</sup> mesenchymal and endothelial populations  
23 among viable, lineage-negative cells in the bone marrow of *Irf8*<sup>+/+</sup> and *Irf8*<sup>d/d</sup> mice. (B)  
24 Flow cytometric analysis of CD45<sup>-</sup> stromal cell subsets among viable, lineage-negative  
25 cells in the spleen of *Irf8*<sup>+/+</sup> and *Irf8*<sup>d/d</sup> mice.

26

### 27 **Supplementary Fig. 3: *Irf8* deficiency couples inflammatory granulopoiesis to** 28 **pro-fibrotic CAR cell remodeling**

29 (A) Dot plot of canonical marker genes supporting cluster annotation of hematopoietic  
30 and stromal populations in the dataset. (B) Quality control metrics across clusters,  
31 illustrating the correlation between totalRNA counts (nCount RNA), number of  
32 detected genes (nFeature RNA) and cluster identity. (C) Genotype contribution  
33 (normalised to total cell number) of *Irf8*<sup>+/+</sup> and *Irf8*<sup>d/d</sup> cells across clusters. (D) Cell-cycle  
34 phase distribution (normalised to total cell number) across clusters. (E) Individual  
35 pseudotime trajectories for monocytic, erythroid and granulocytic differentiation,  
36 reconstructed from hematopoietic progenitors. (F) Absolute number of significantly up-  
37 or downregulated transcription factors per annotated cell population. (G) Volcano plot  
38 of selected, differentially expressed genes underlying TNF $\alpha$  pathway activity in mature  
39 neutrophils (n = 5,926 total genes) comparing *Irf8*<sup>d/d</sup> vs. *Irf8*<sup>+/+</sup> bone marrow. (H)  
40 Volcano plot of selected, differentially expressed genes underlying TGF- $\beta$  pathway  
41 activity in CAR cells 1 (n = 11,319 total genes) comparing *Irf8*<sup>d/d</sup> vs. *Irf8*<sup>+/+</sup> bone  
42 marrow. (I) Global cell-cell communication heatmap (CrossTalkR) depicting inferred  
43 interaction strength between cell populations. (J) Frequency of ligand and receptor  
44 usage across genotypes. (K) Inferred TGF- $\beta$ -mediated signaling interactions. (L)  
45 Inferred Itgb1-dependent signaling interactions. (M) Hallmark pathway enrichment  
46 analysis across cell populations.

47

### 48 **Supplementary Fig. 4: Hematopoietic *Irf8* loss is sufficient to activate** 49 **inflammatory perivascular niche remodeling.**

50 (A) Body weight over time of *Irf8*<sup>+/+</sup> and *Irf8*<sup>d/d</sup>→Gli1CreERT;tdTomato chimeras,  
51 illustrating a chronic, non-aggressive course with stable body weight over 14 weeks.  
52 (B) Peripheral blood counts. (C) Frequencies of peripheral blood immune cell  
53 populations determined by flow cytometry. (D) Frequencies of bone marrow immune  
54 cell populations determined by flow cytometry. (E, F) Frequencies of the hematopoietic  
55 stem and progenitor cells in the bone marrow (E) and spleen (F). (G) H&E-stained  
56 spleen sections with quantification of white pulp area, revealing reduced white pulp  
57 regions in *Irf8*<sup>d/d</sup>→Gli1CreERT;tdTomato chimeras; white pulp regions are highlighted  
58 by dashed lines. Scale bar: 300 μm. (H) Reticulin staining of spleen and bone marrow  
59 sections. Scale bar bone: 60 μm. Scale bar spleen: 300 μm. (I) Dot plots of canonical  
60 marker genes supporting cluster annotation of hematopoietic and stromal populations.  
61 (J) Quality control metrics across clusters, illustrating the correlation between total  
62 RNA counts (nCount RNA), number of detected genes (nFeature RNA) and cluster  
63 identity. (K) Cell-cycle phase distribution (normalised to total cell number) across  
64 clusters. (L) scProportion test assessing genotype contribution of *Irf8*<sup>d/d</sup> vs. *Irf8*<sup>+/+</sup>  
65 across clusters. (M) Differentially expressed gene analysis between *Irf8*<sup>d/d</sup> and *Irf8*<sup>+/+</sup>  
66 bone marrow (FDR = 0.05, |log<sub>2</sub>FC| > 0.25).

67  
68 **Supplementary Fig. 5: Early neutrophil progenitors drive inflammatory and**  
69 **structural remodeling of the vascular niche upon hematopoietic *Irf8* deficiency.**

70 Single-cell transcriptomic analysis of bone marrow from recipient mice reconstituted  
71 with *Irf8*<sup>+/+</sup> or *Irf8*<sup>d/d</sup> c-Kit-enriched hematopoietic cells.

72 (A) Global cell-cell communication heatmap (CrossTalkR) depicting inferred  
73 interaction strength between cell populations. (B) Absolute receptor usage for *S100a8*  
74 as a ligand. (C) Sankey plot depicting inferred receptor-ligand interactions with a focus  
75 on *Tlr4* as a central receptor on arteriolar and sinusoidal endothelial cells. (D) Heatmap  
76 of blood vessel morphogenesis and angiogenesis-related pathways across selected  
77 cell populations, comparing *Irf8*<sup>d/d</sup> vs. *Irf8*<sup>+/+</sup> chimeras across clusters. (E) Hypoxia  
78 (turquoise, HIF-1α)-associated S100A8/9 (white) expression and pro-fibrotic signaling  
79 (orange, TGF-β) in bone marrow organoids. Scale bar: 50 μm.

80 **Supplementary Fig. 6: Direct regulation of S100A8 by IRF8 restrains hypoxia-**  
81 **associated inflammatory niche remodeling.**

82 (A) Volcano plots of selected, differentially expressed, fibrosis-associated genes in  
83 multipotent (n = 8,187 total genes) and inflammatory CAR cells (n = 7,514 total genes)  
84 and OLCs (n = 7,718 total genes), comparing *Irf8*<sup>d/d</sup> vs. *Irf8*<sup>+/+</sup> bone marrow chimeras  
85 and showing significant overlap with a reference myelofibrosis dataset. Fisher's exact  
86 test demonstrated significant enrichment with fibrotic MSC-1 for multipotent CAR cells  
87 (24 overlapping genes, odds ratio = 27.68 and p-value = 9.28x10<sup>-23</sup>), inflammatory  
88 CAR cells (17 overlapping genes, ratio = 15.51, p-value = 1.84x10<sup>-13</sup>), cycling CAR  
89 cells (24 overlapping genes, odds ratio = 4.63 and p-value = 1.86x10<sup>-7</sup>), and OLCs (31  
90 overlapping genes, odds ratio = 11.82 and p-value = 2.24x10<sup>-17</sup>). Significant enrichment  
91 with MSC-2 was also observed across these stromal subsets, although with lower  
92 overlap and effect size compared with fibrotic MSC-1. (B) Heatmap of extracellular  
93 matrix-related pathways across selected cell populations, comparing *Irf8*<sup>d/d</sup> vs. *Irf8*<sup>+/+</sup>  
94 bone marrow chimeras. (C) Ridge plots of *Hif-1a*, *S100a8* and *S100a9* expression in  
95 CAR cell subsets and OLCs. (D) Overlap of transcription factor activity profiles across  
96 CAR cell subtypes and OLCs, showing enrichment of hypoxia-associated factors and

97 increased Hif1 $\alpha$ –Arnt activity in *Irf8*<sup>d/d</sup> stromal populations. **(E)** Intracellular CrossTalkR  
98 analysis of cycling CAR cells. **(F)** Cell-cell interaction analysis comparing *Irf8*<sup>d/d</sup> with  
99 *Irf8*<sup>+/+</sup> chimeras. **(G, H)** Intracellular S100A8 staining in bone marrow **(G)** and spleen  
100 **(H)** by flow cytometry of *Irf8*<sup>+/+</sup> and *Irf8*<sup>d/d</sup> mice. Dotted line represents background  
101 mean fluorescence intensity at a value of 600. **(I)** Representative CODEX microscopy  
102 images of Gli1 *Irf8*<sup>d/d</sup> and Gli1 *Irf8*<sup>+/+</sup> spleens showing deposition of inflammatory  
103 S100A8/9<sup>+</sup> cells in the red pulp and disorganized white pulp structures. Scale bar: 100  
104  $\mu$ m.

105

106 **Supplementary Fig. 7: St S100A8/A9 inflammatory niche remodeling promotes**  
107 **BRC–ABL-driven disease progression and fibrosis.**

108 Panels (A-F) correspond to the transplanted mouse experiment shown in Figure 7A.

109 **(A)** Peripheral blood counts in *Irf8*<sup>d/d</sup> vs. *Irf8*<sup>+/+</sup> recipients transplanted with pMIG- or  
110 BCR-ABL-transduced c-Kit enriched bone marrow cells, revealing normal counts in  
111 controls but marked leukocytosis in BCR-ABL-transplanted mice. **(B)** Frequencies of  
112 peripheral blood immune cell populations determined by flow cytometry. **(C,D)**  
113 Frequencies of hematopoietic stem and progenitor cells in bone marrow **(C)** and  
114 spleen **(D)** determined by flow cytometry. **(E,F)** Frequencies of bone marrow **(E)** and  
115 spleen **(F)** immune cell populations determined by flow cytometry. **(G)** Reticulin  
116 staining of bone marrow biopsies in a CML patient cohort: grades 0 and 1 (N = 15),  
117 grade 2 (N = 4), stratified by fibrosis severity. and used to correlate S100A8/9 staining  
118 intensity and fibrosis grade in the same cohort **(H)**.

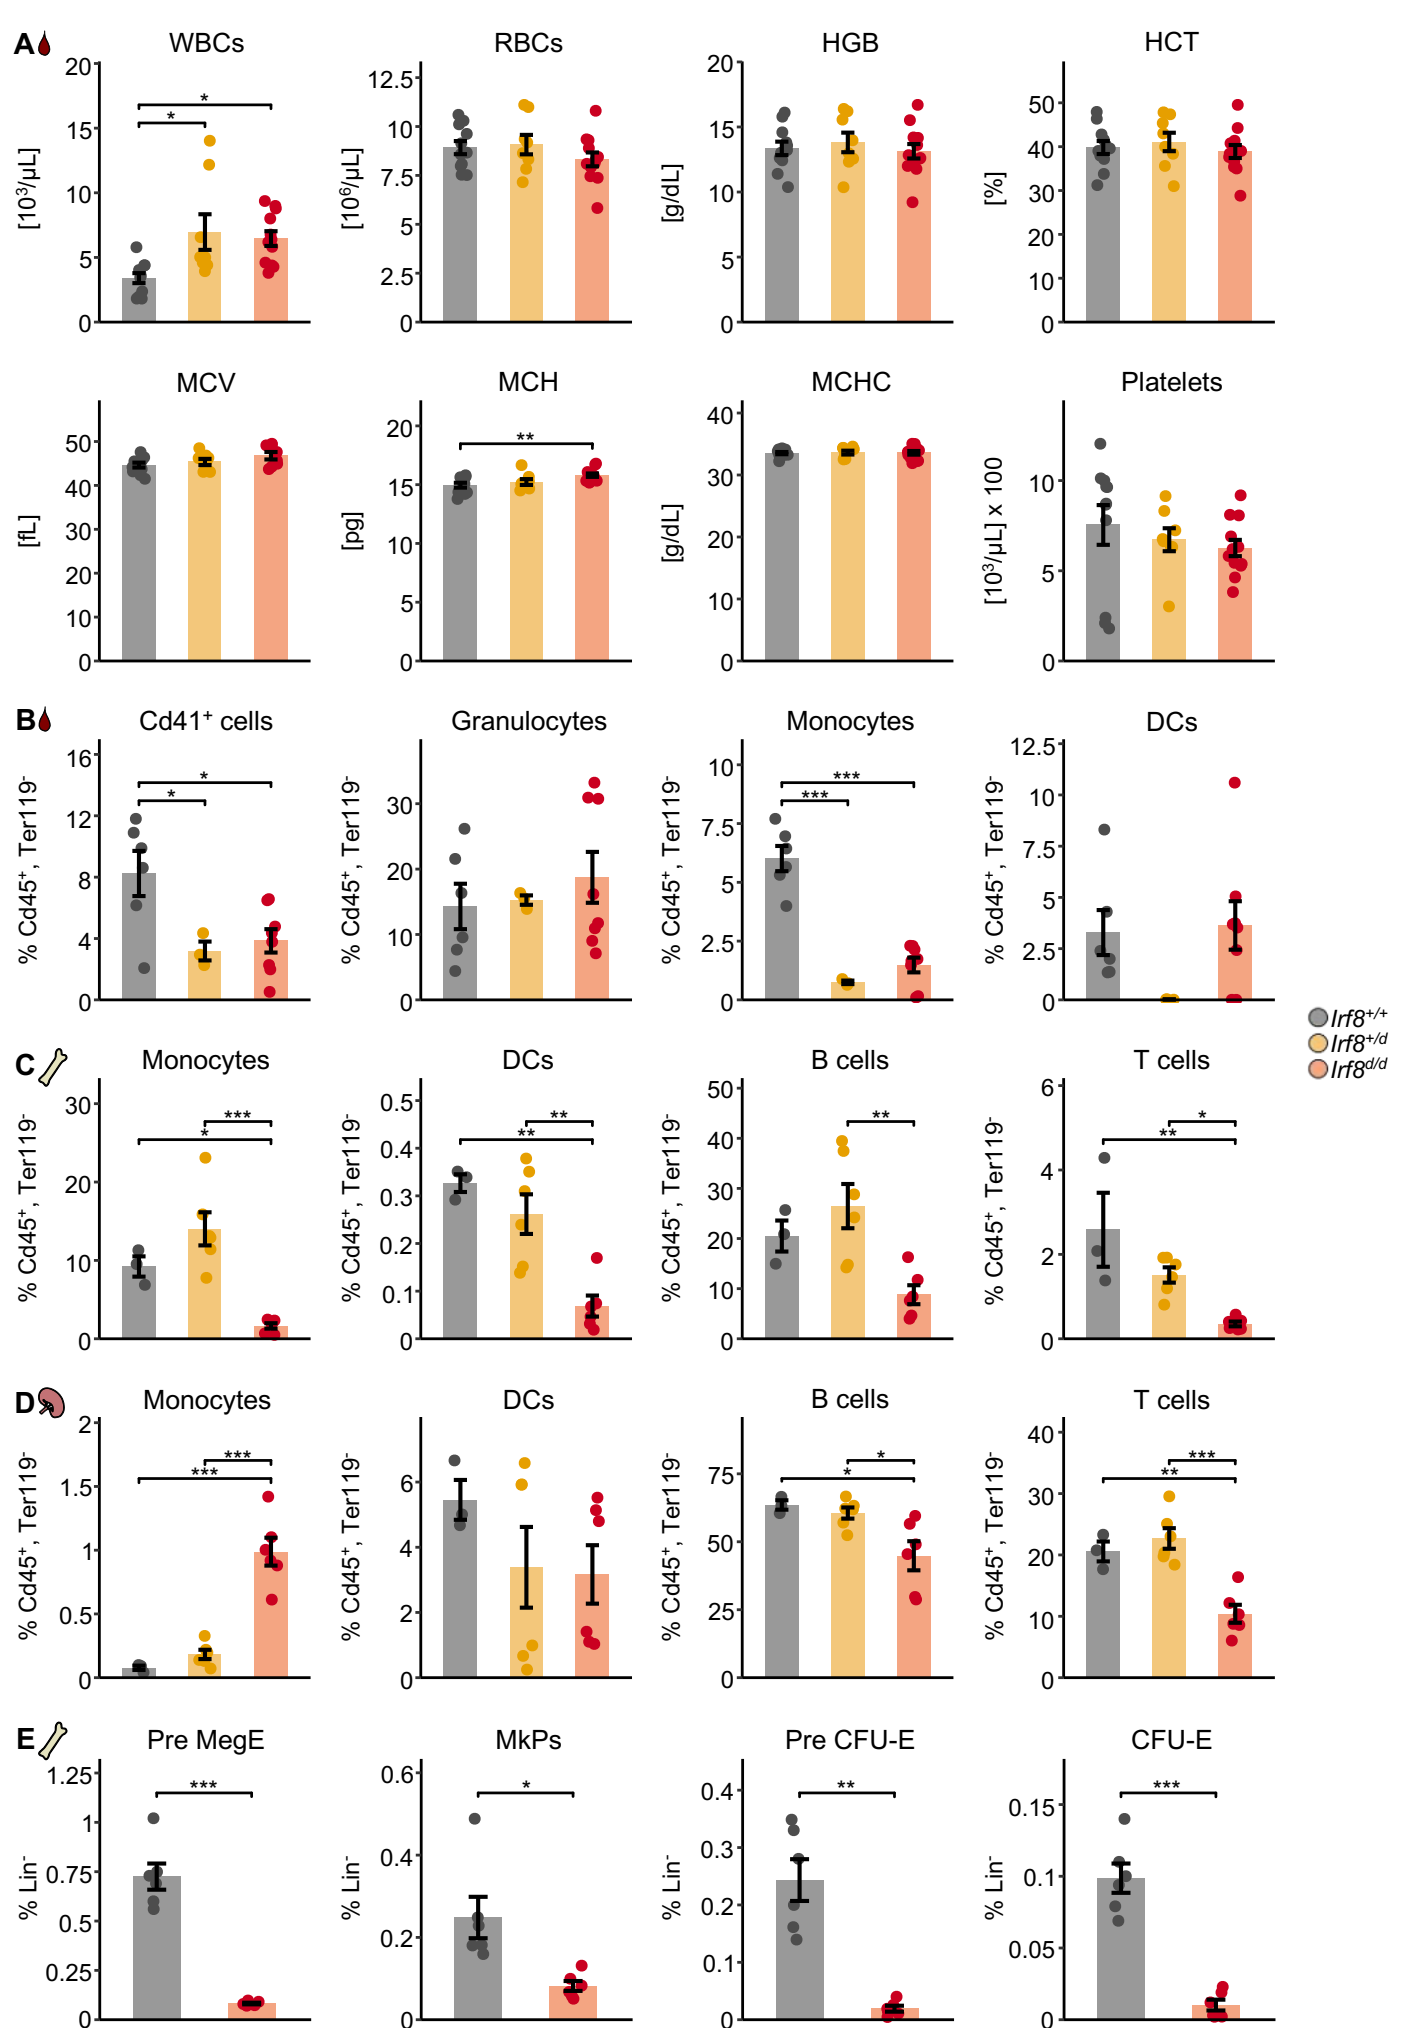

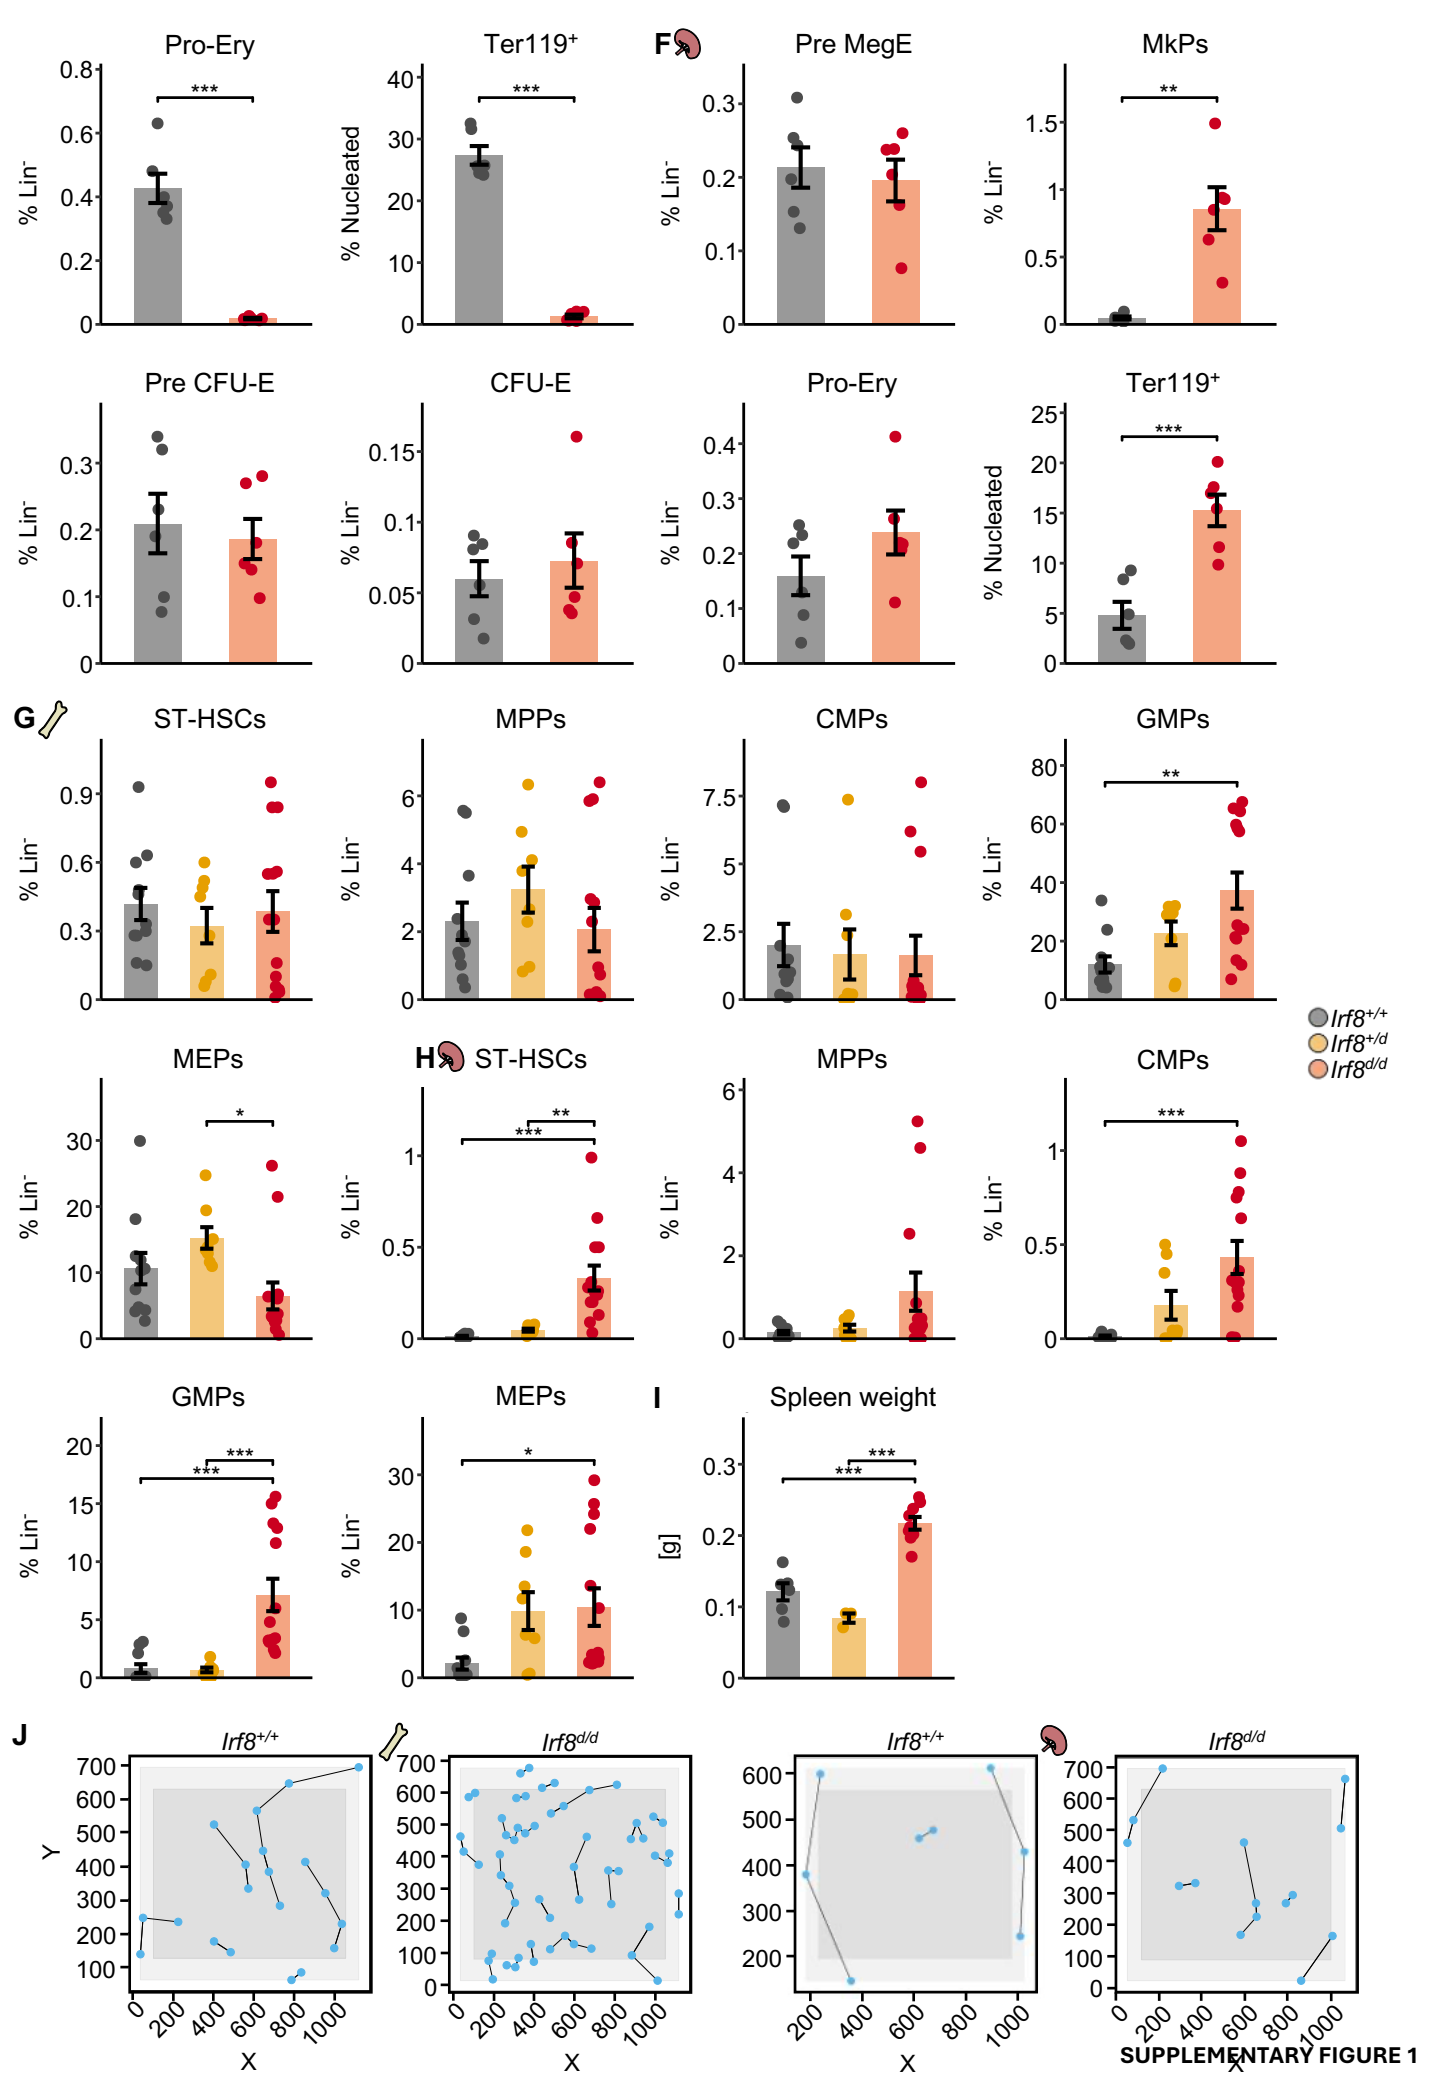

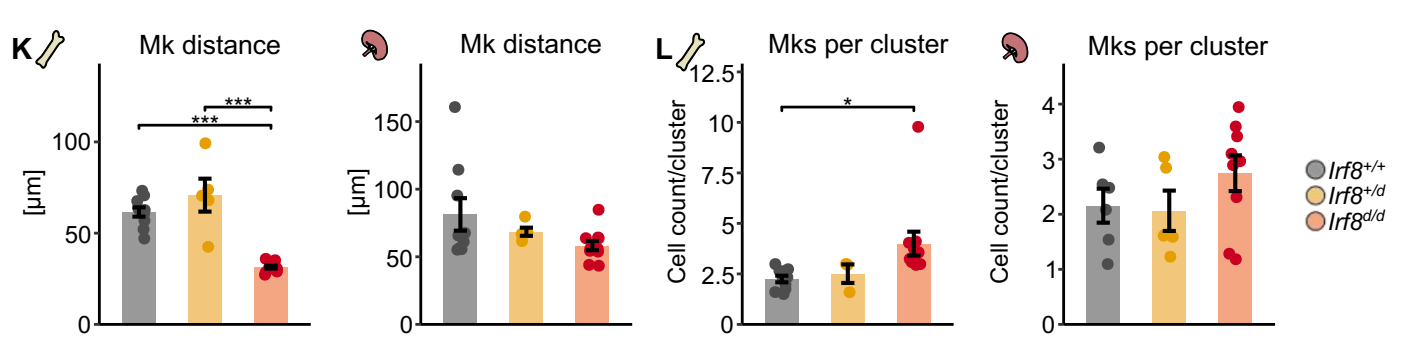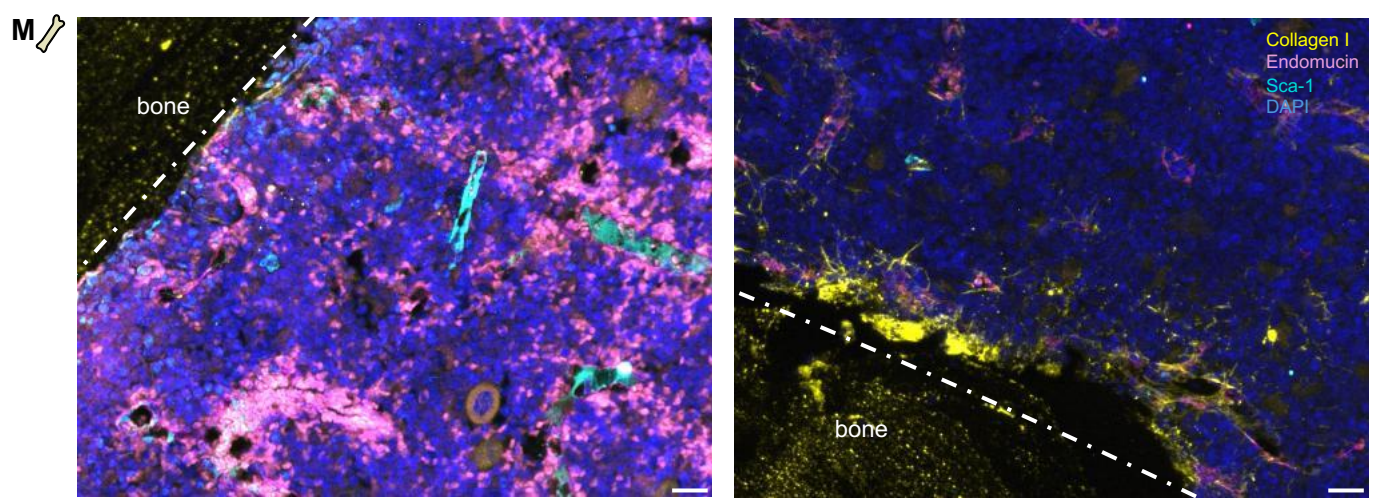

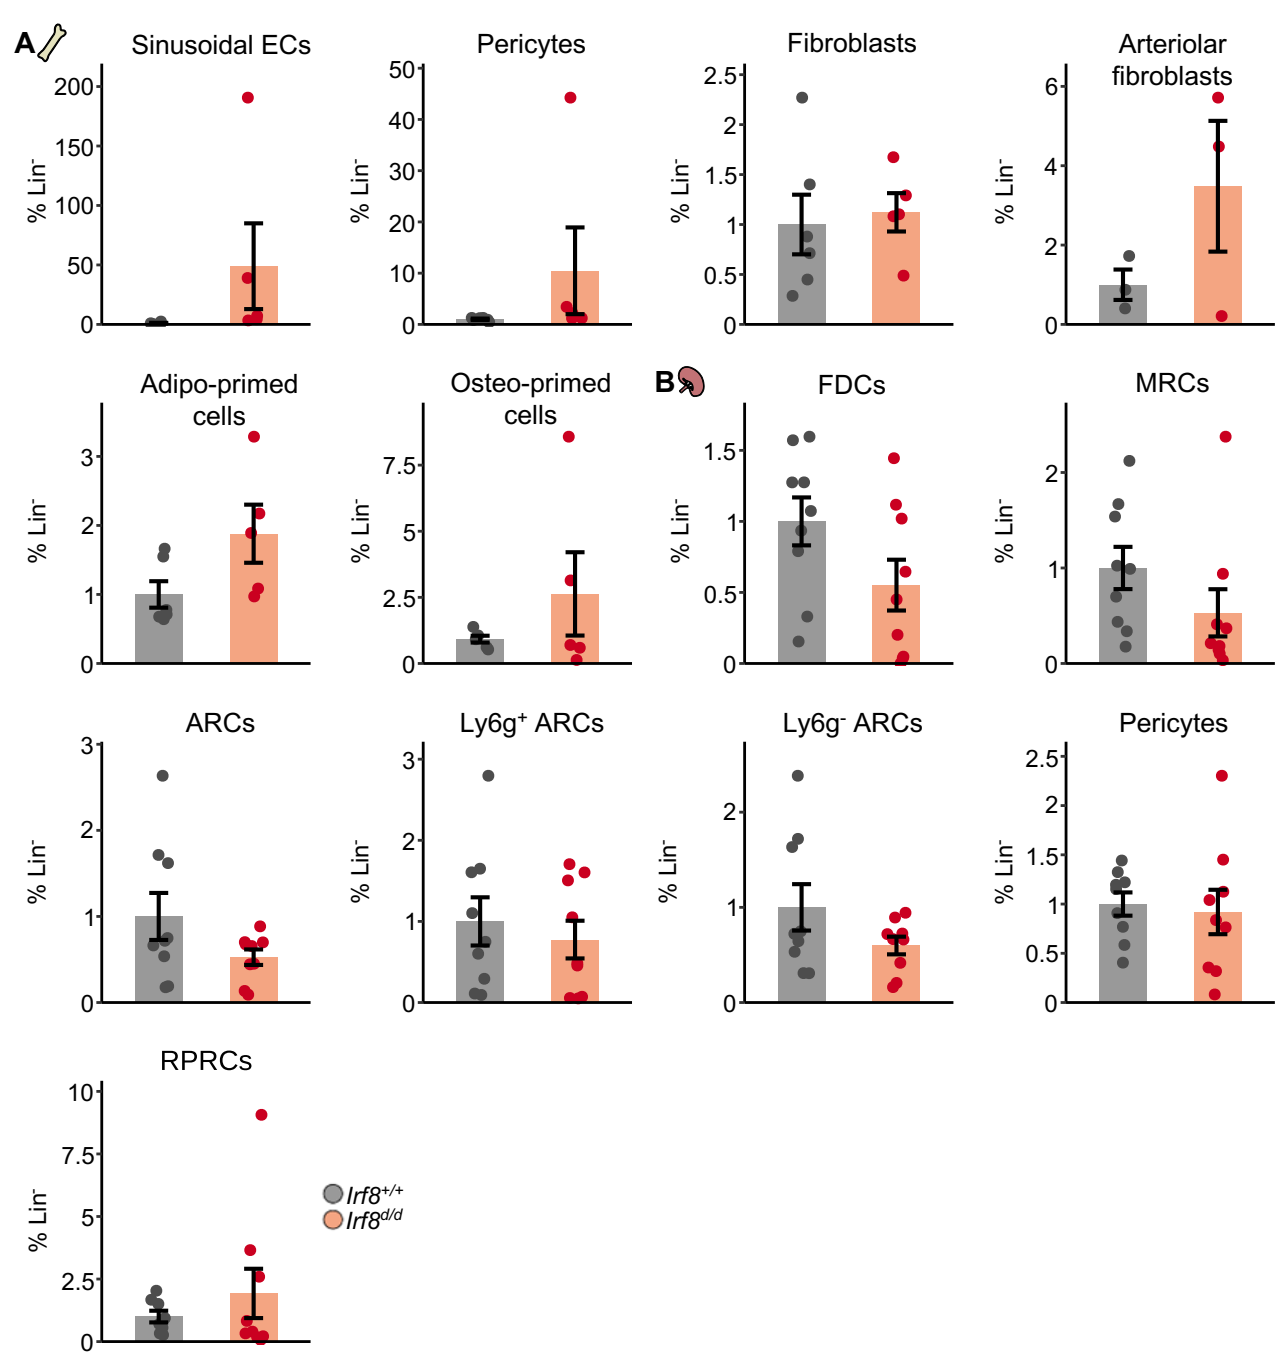

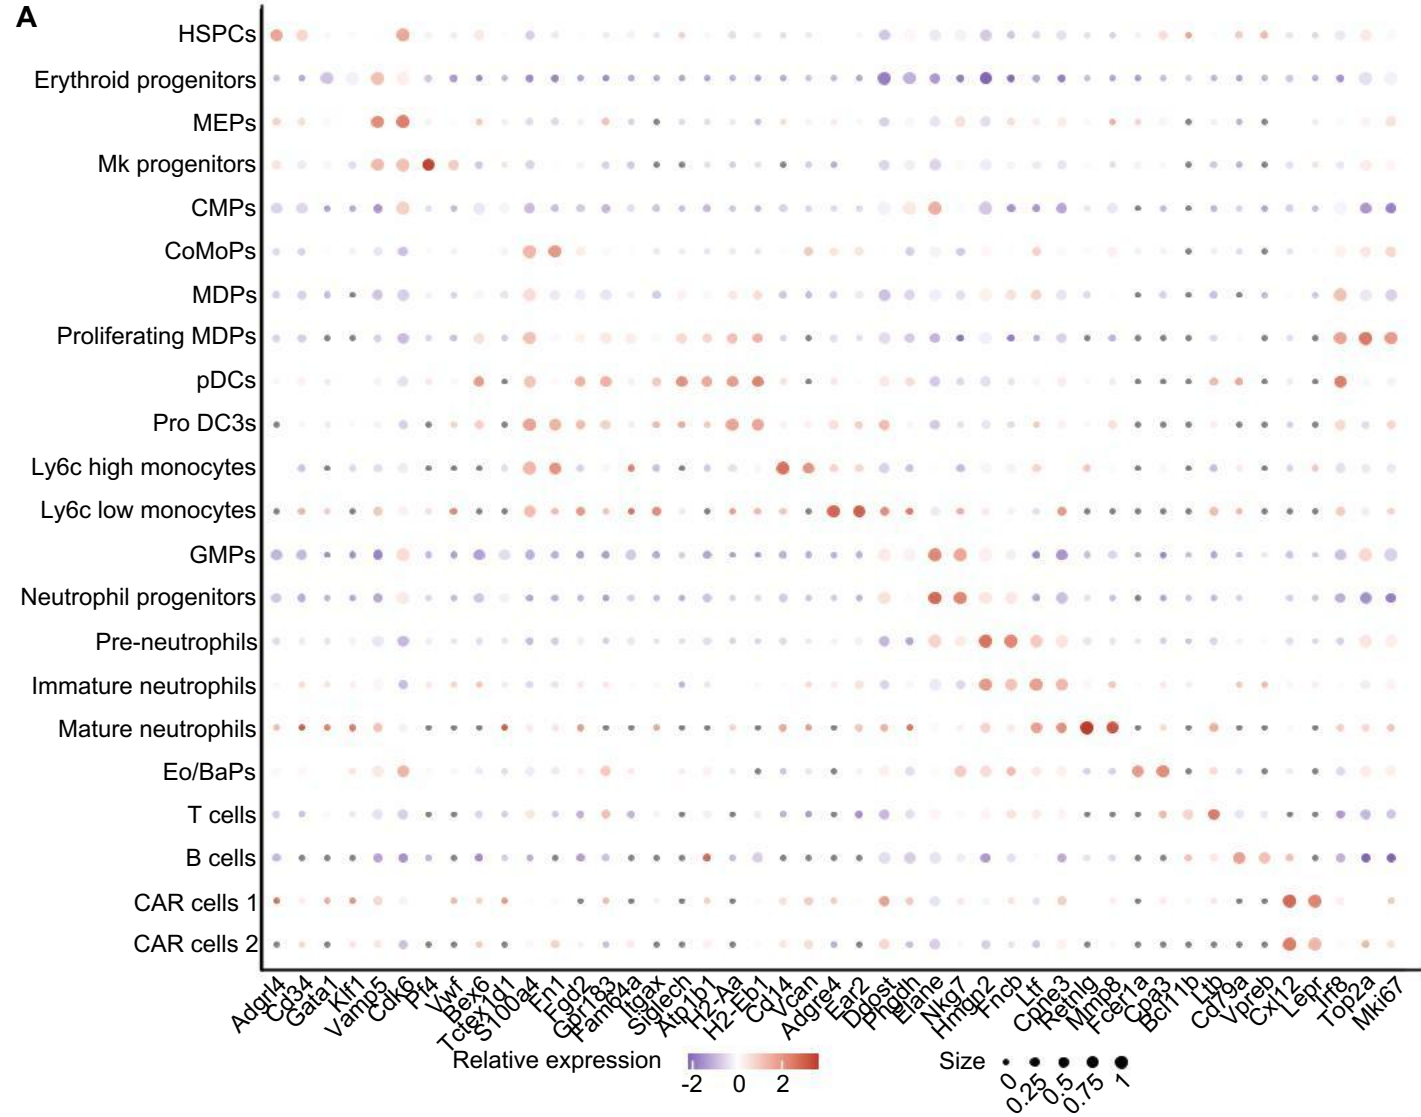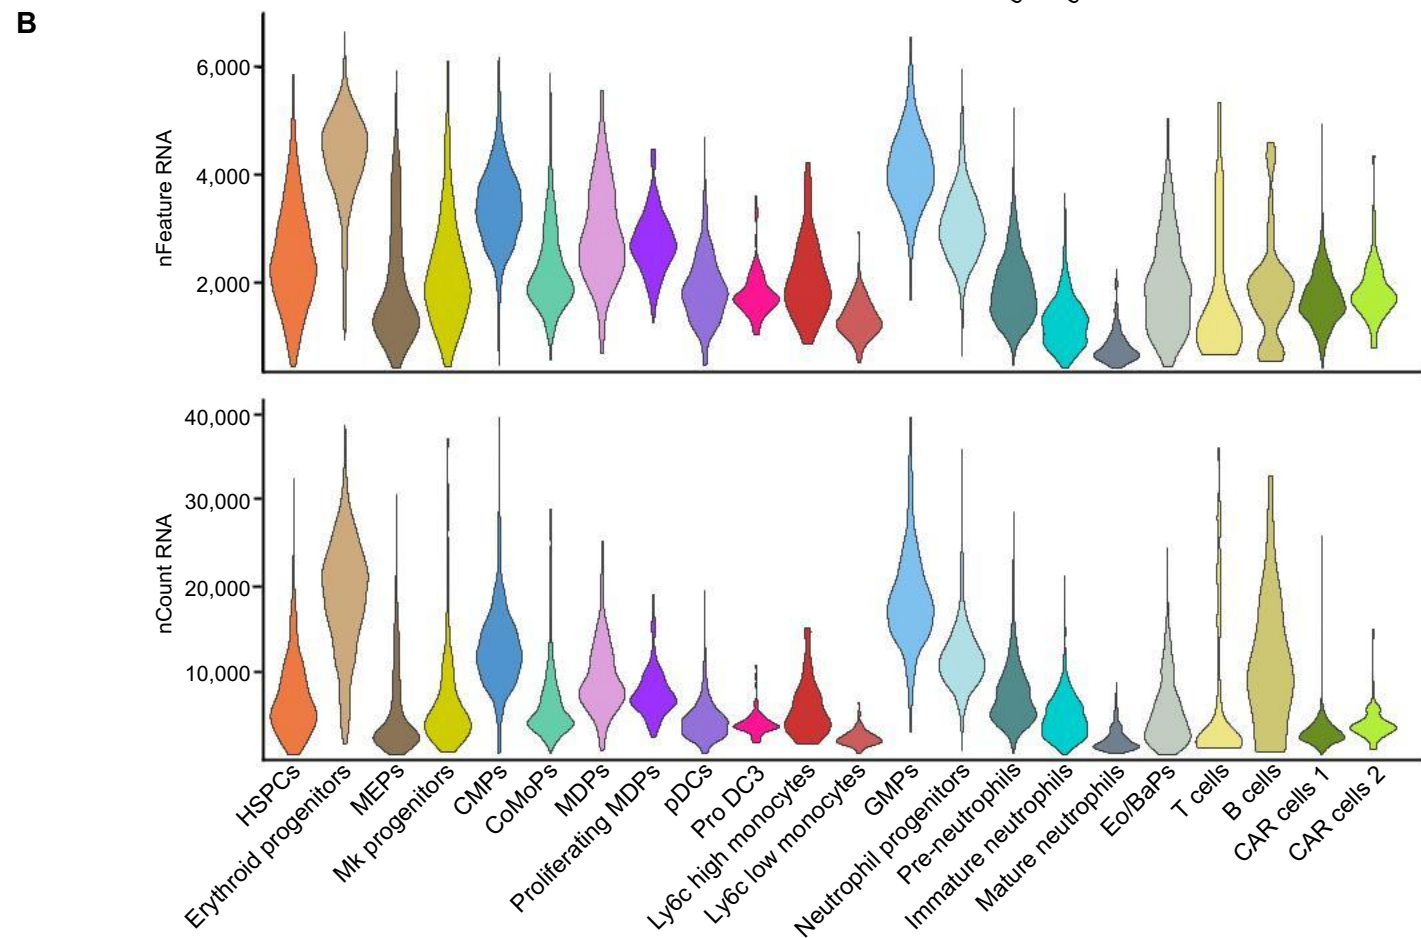

**C**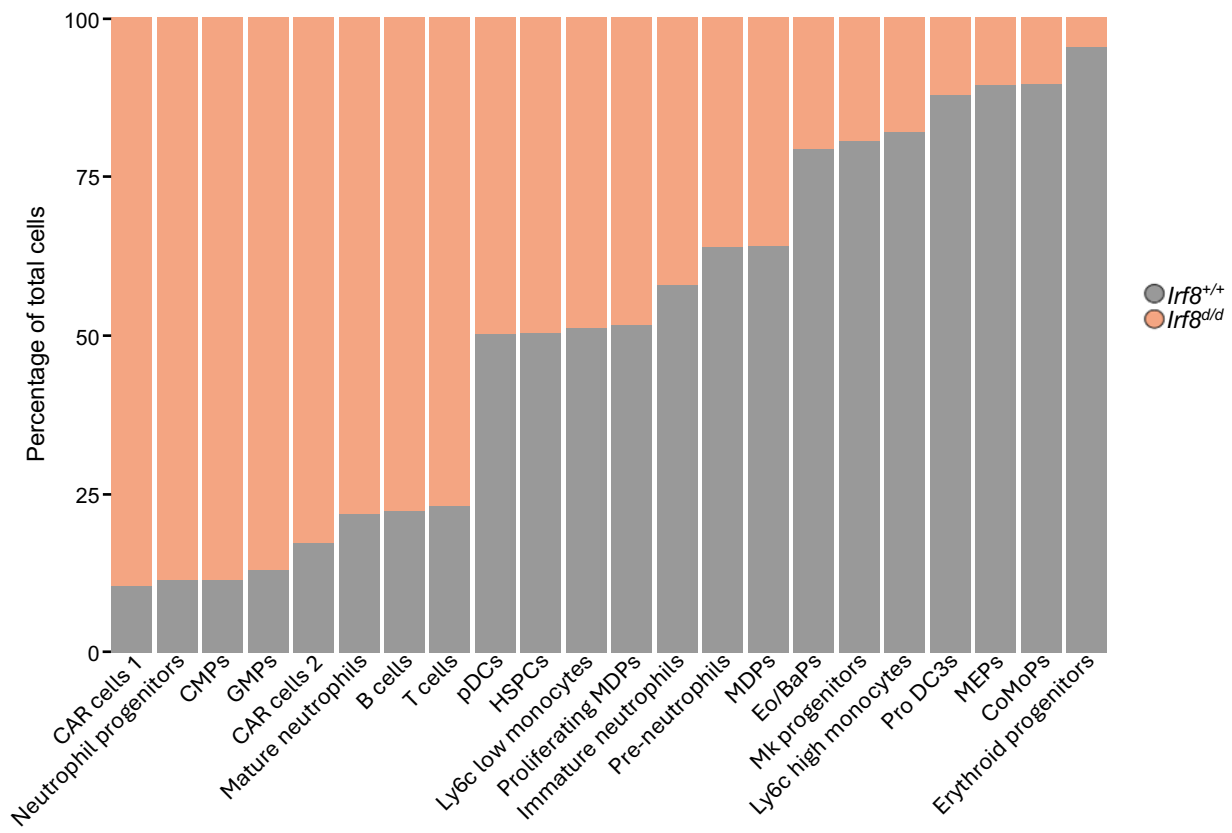**D**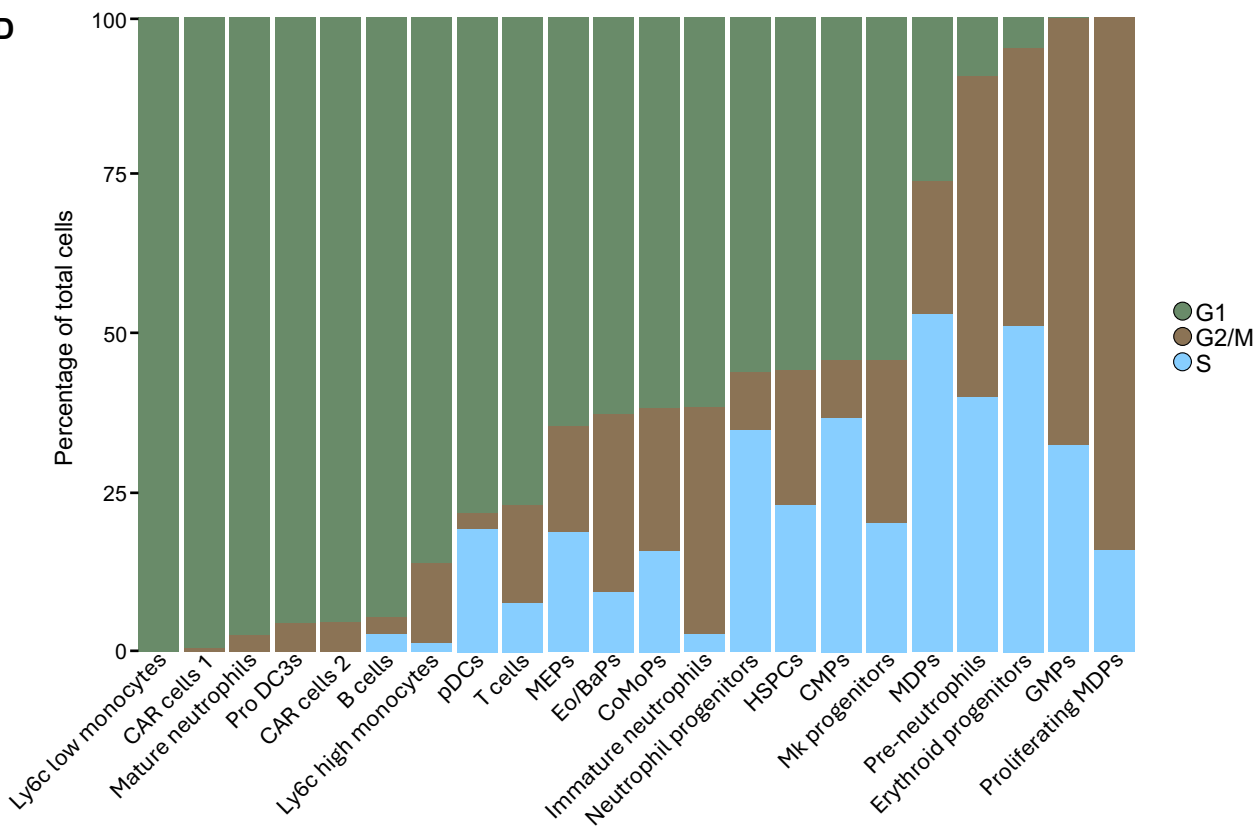

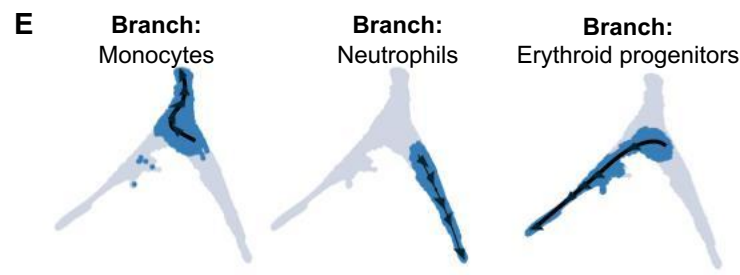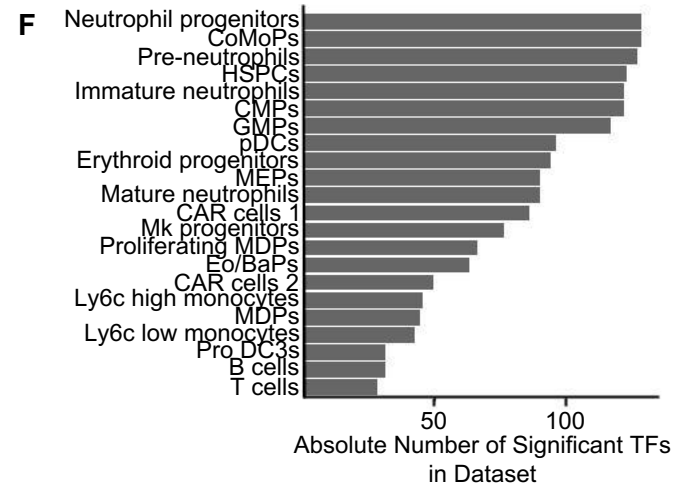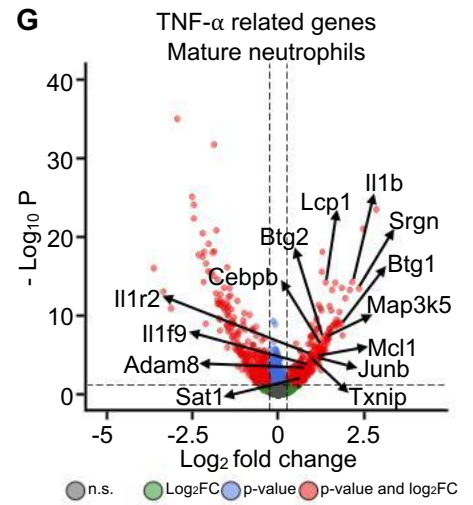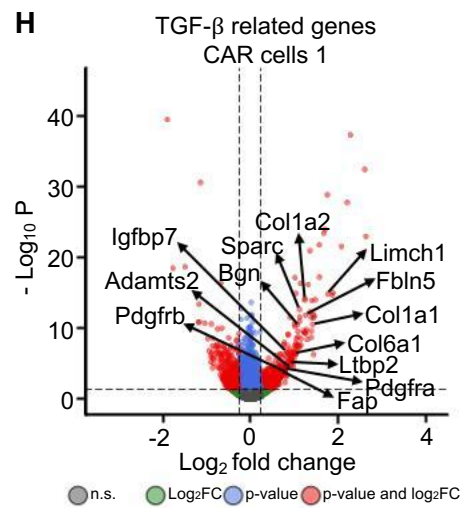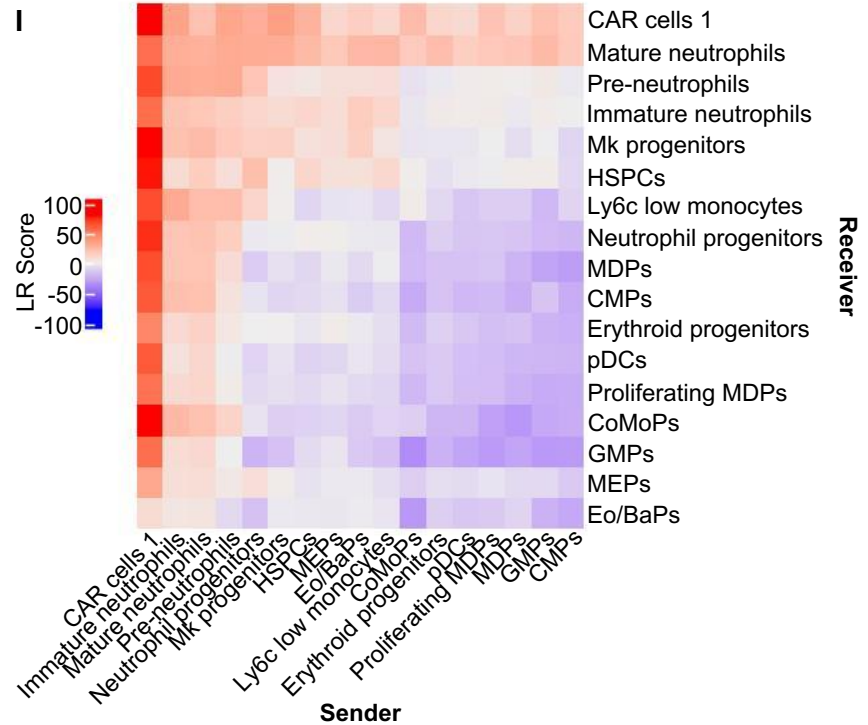

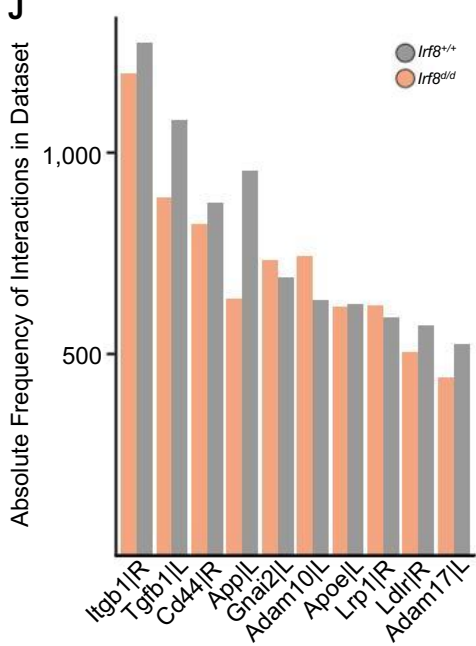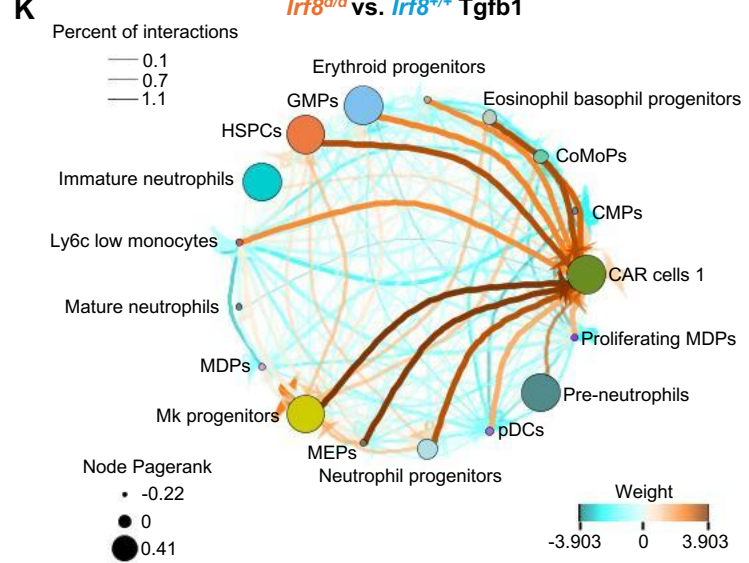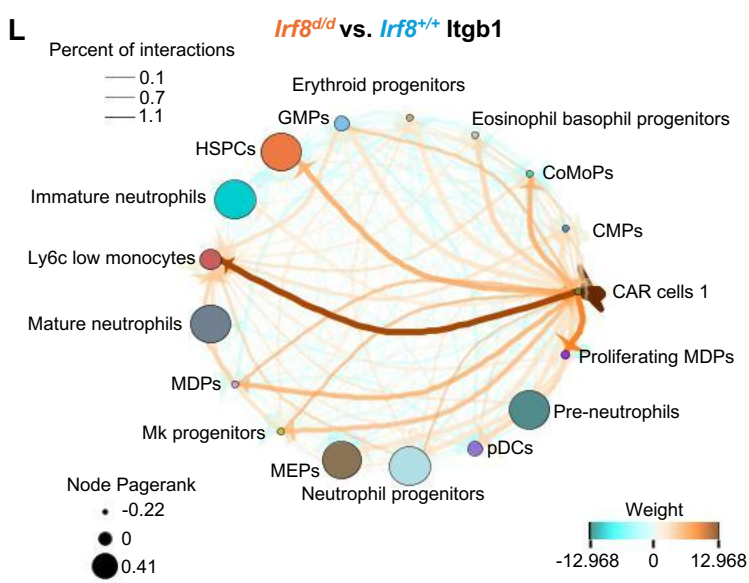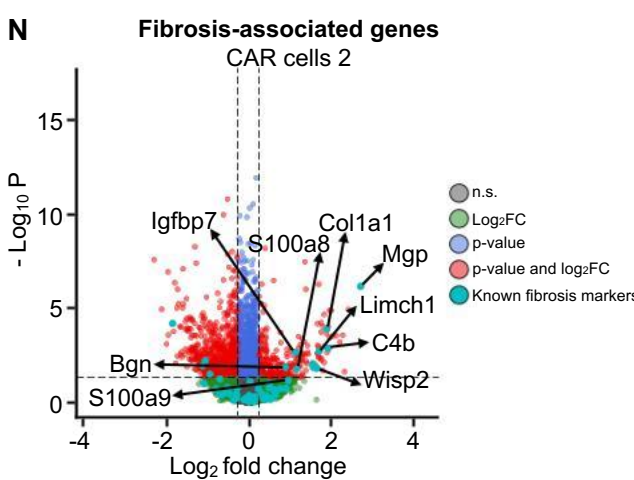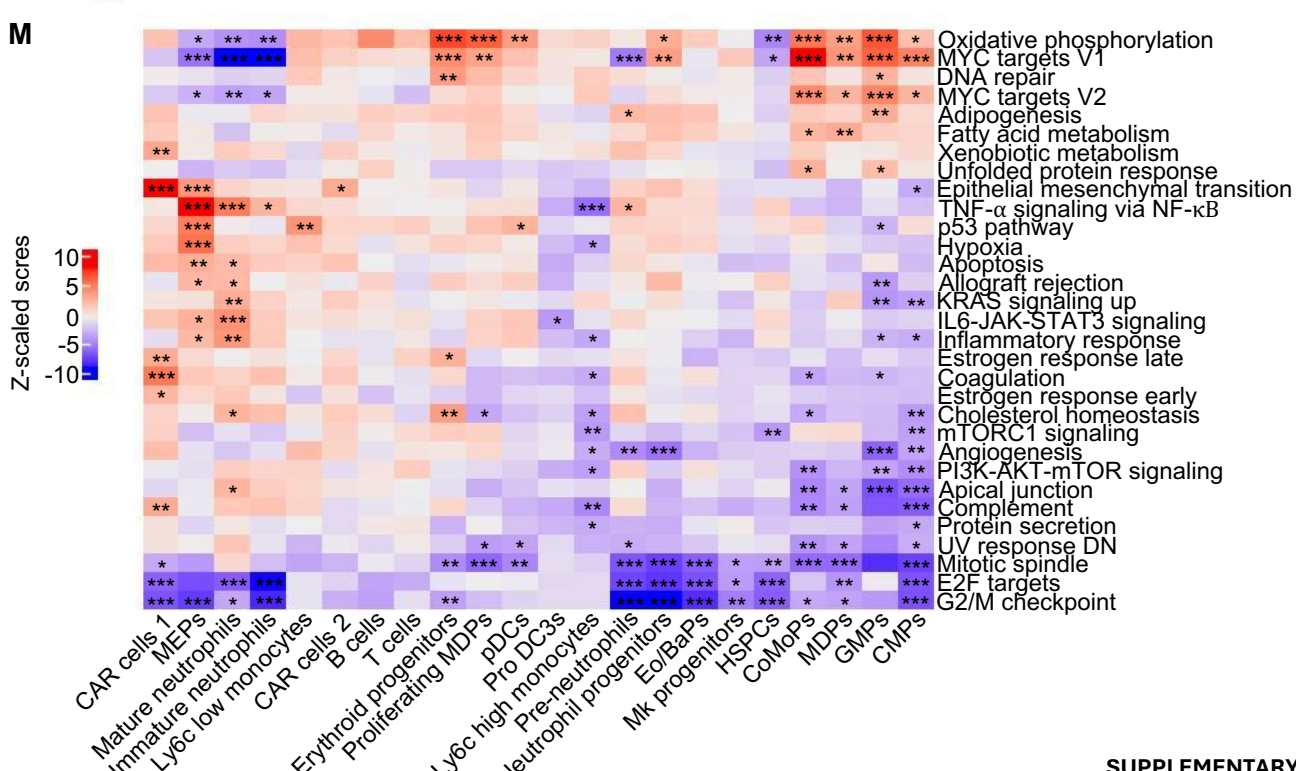

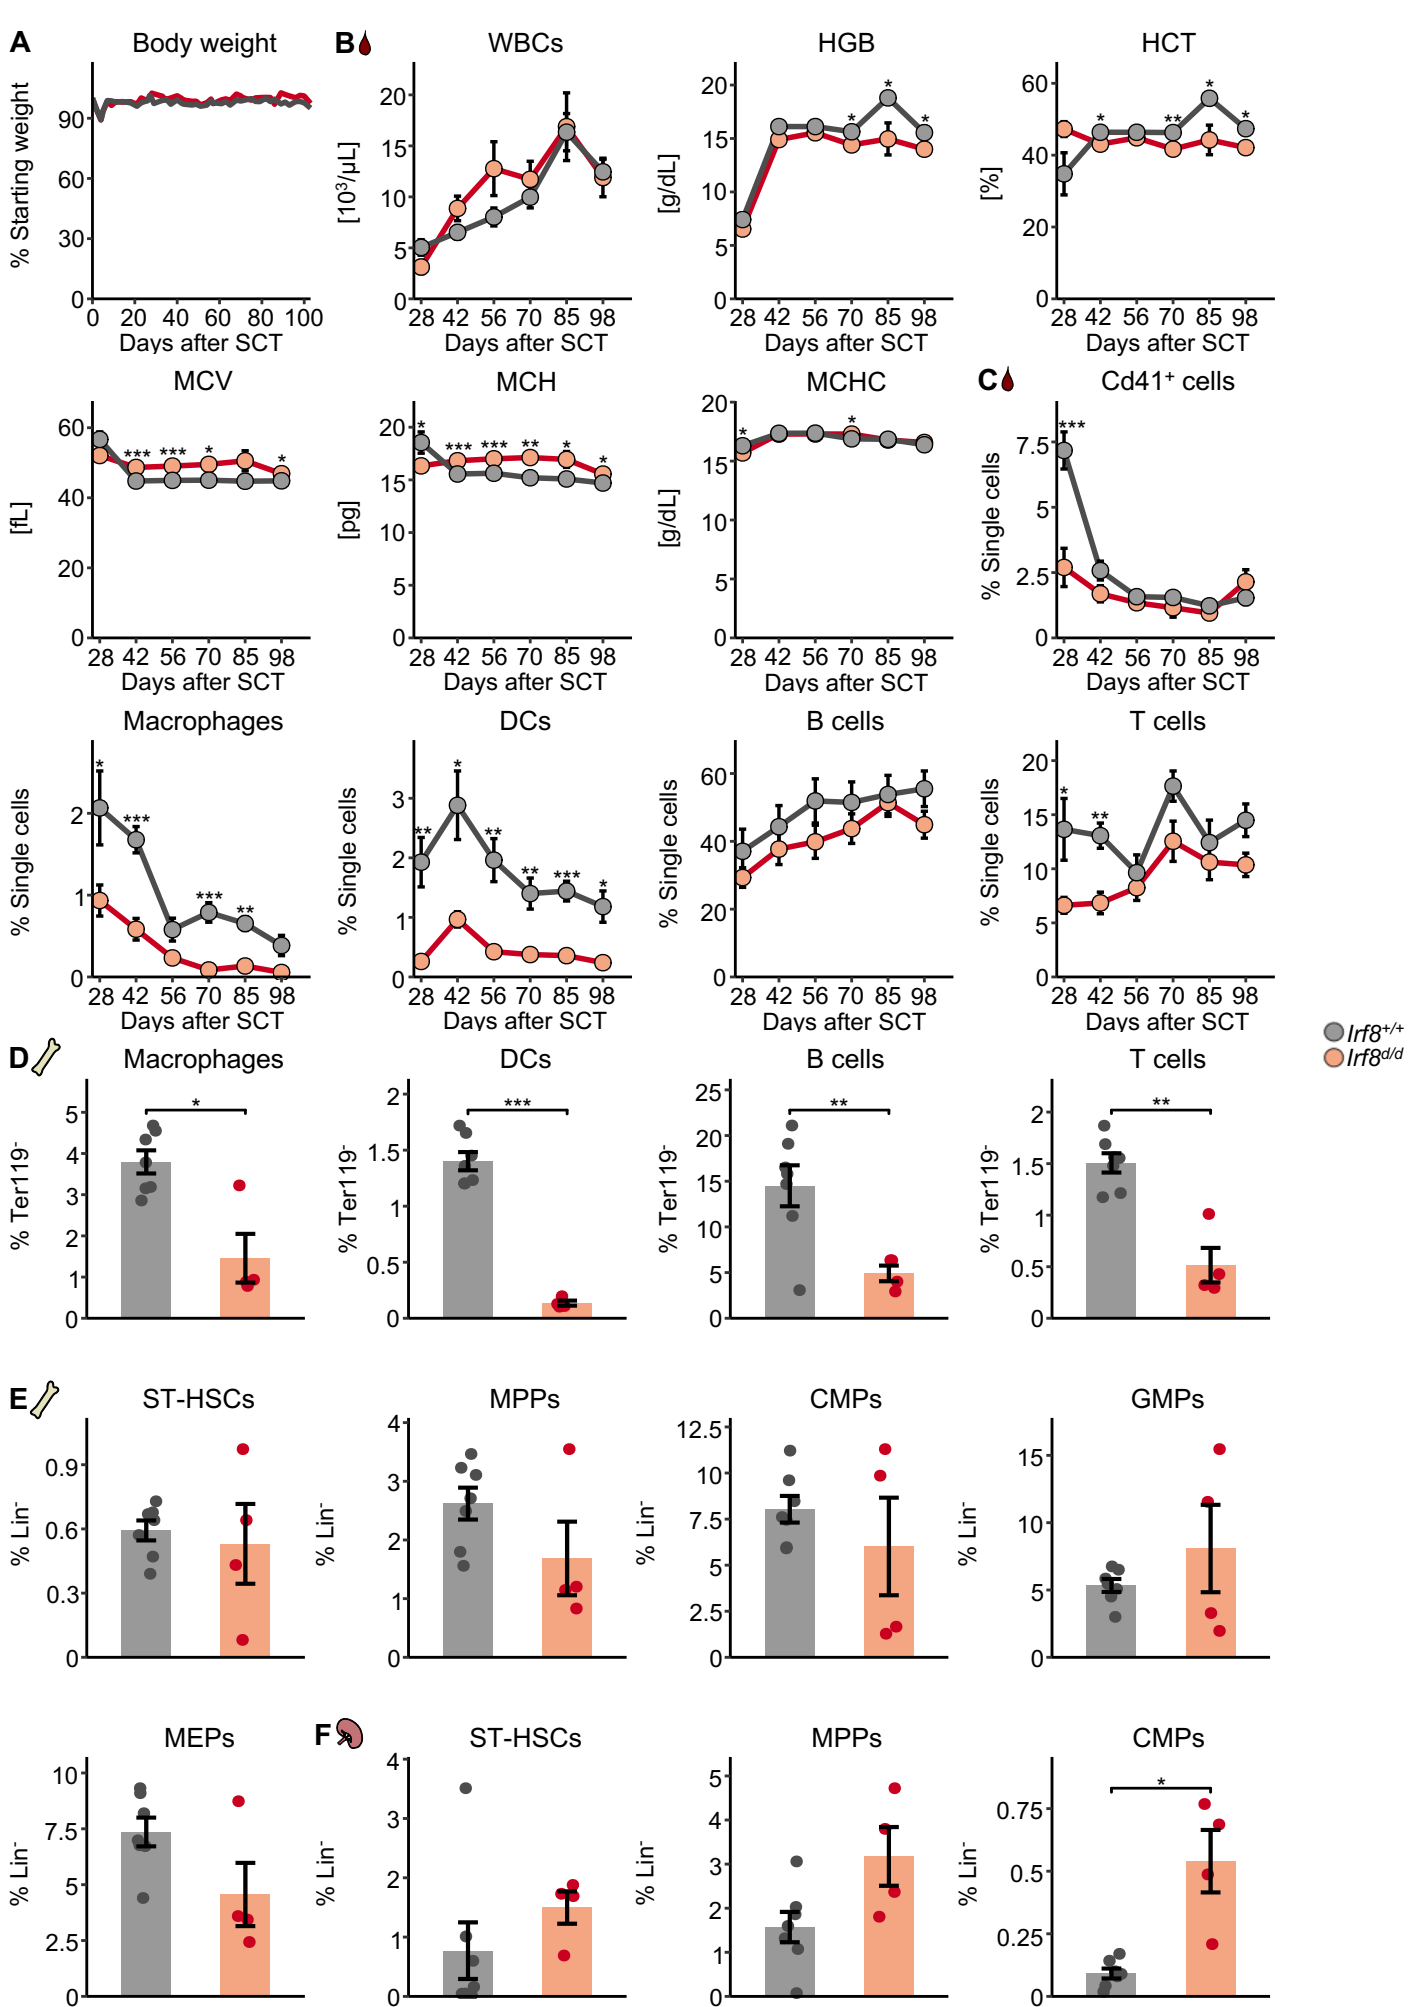

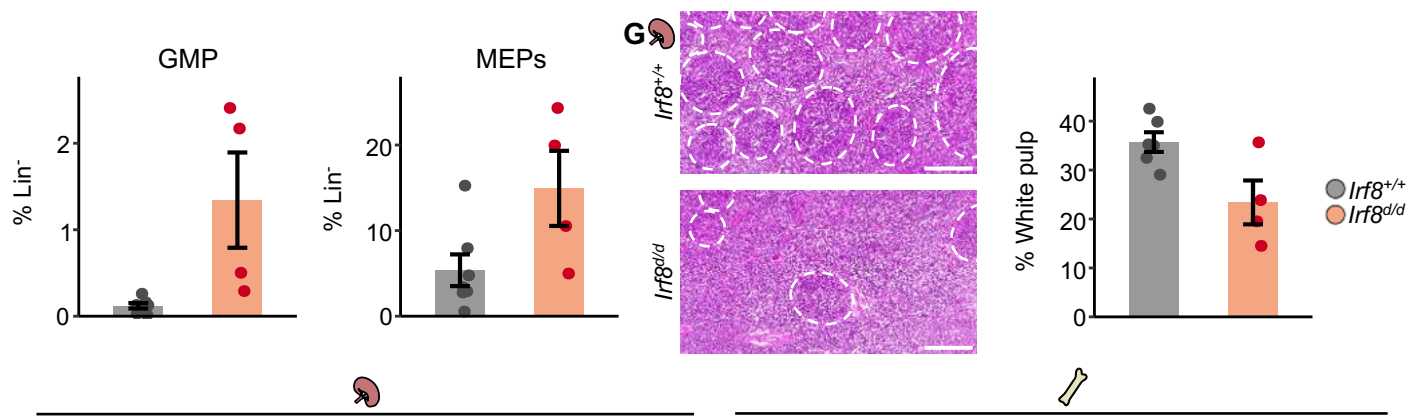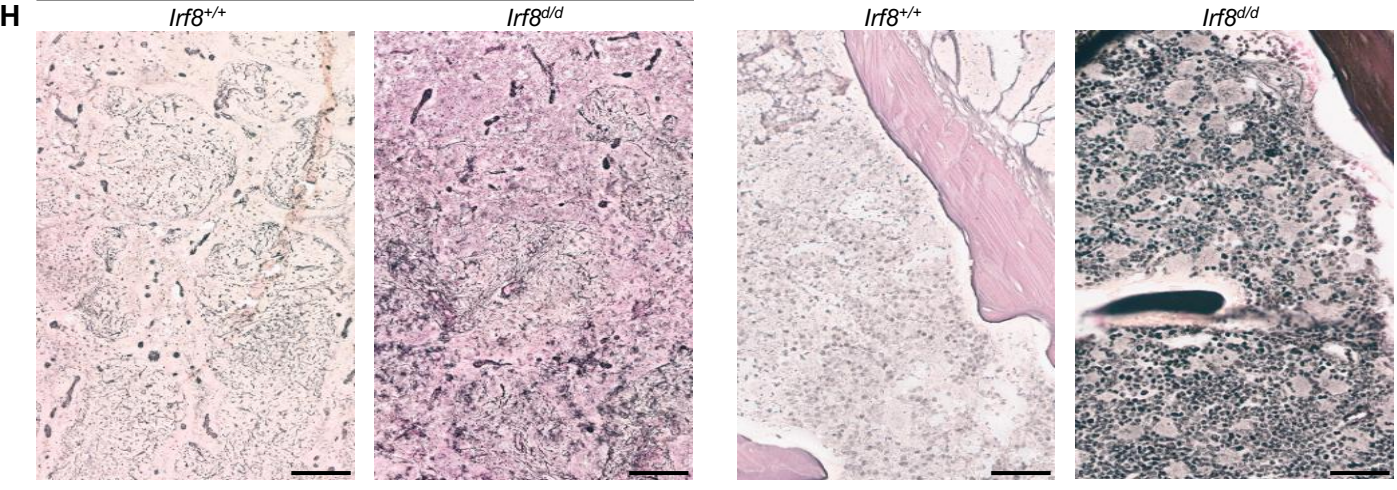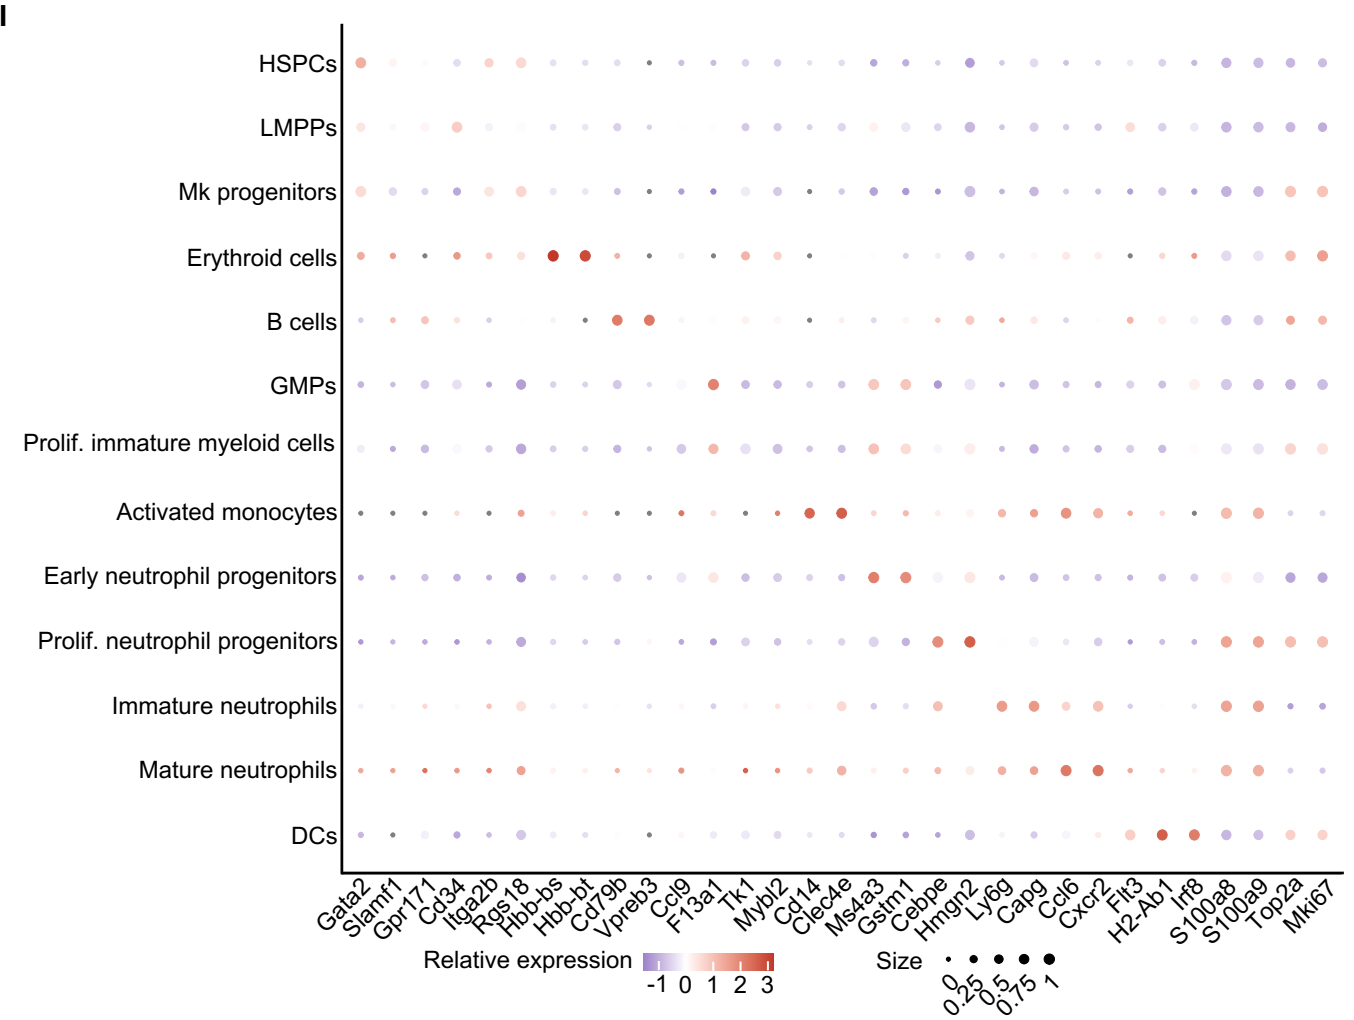

SUPPLEMENTARY FIGURE 4

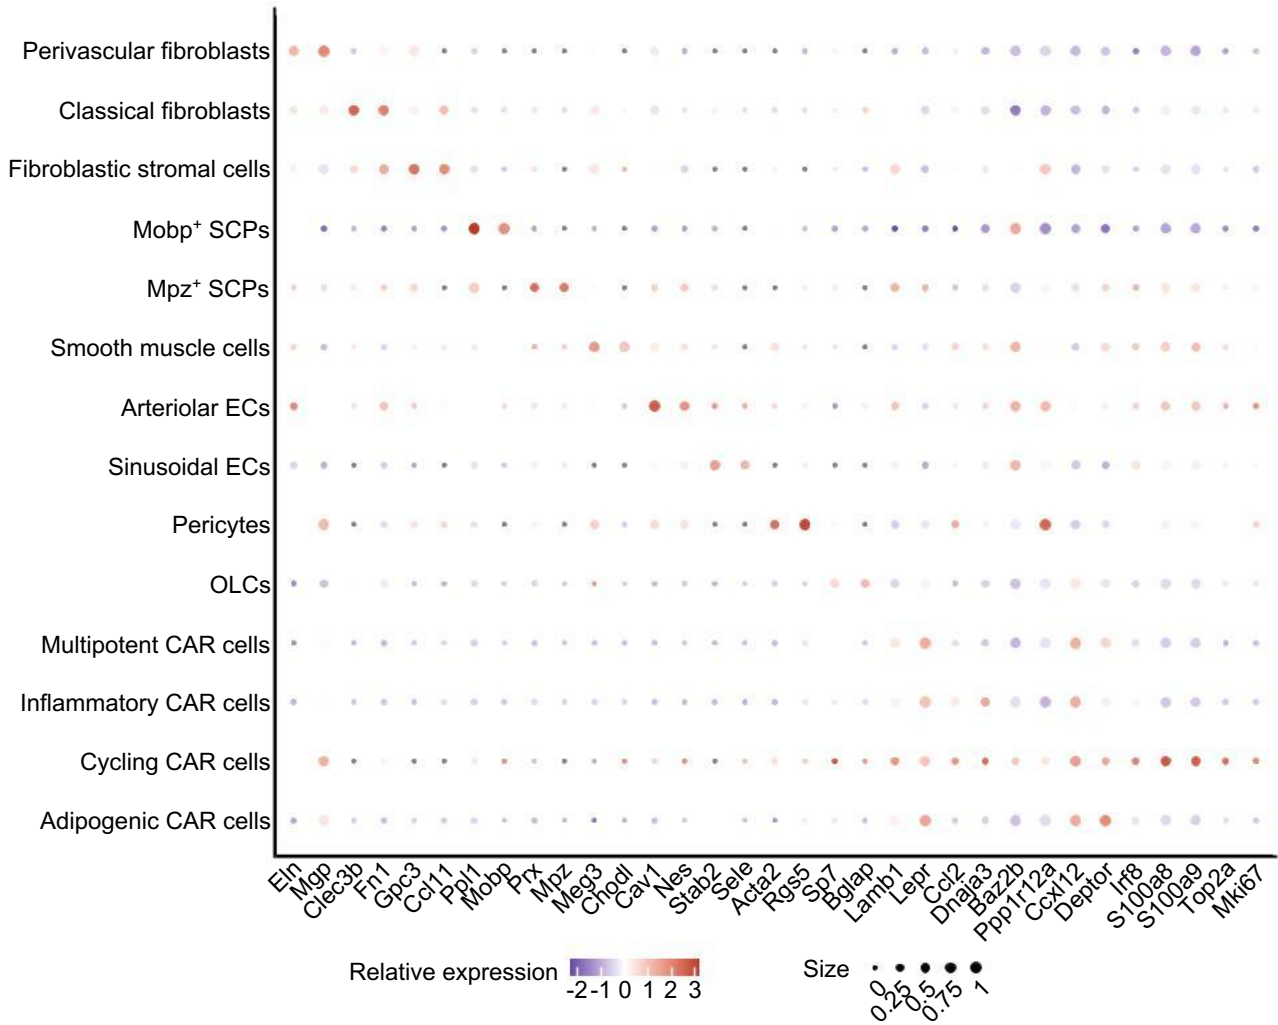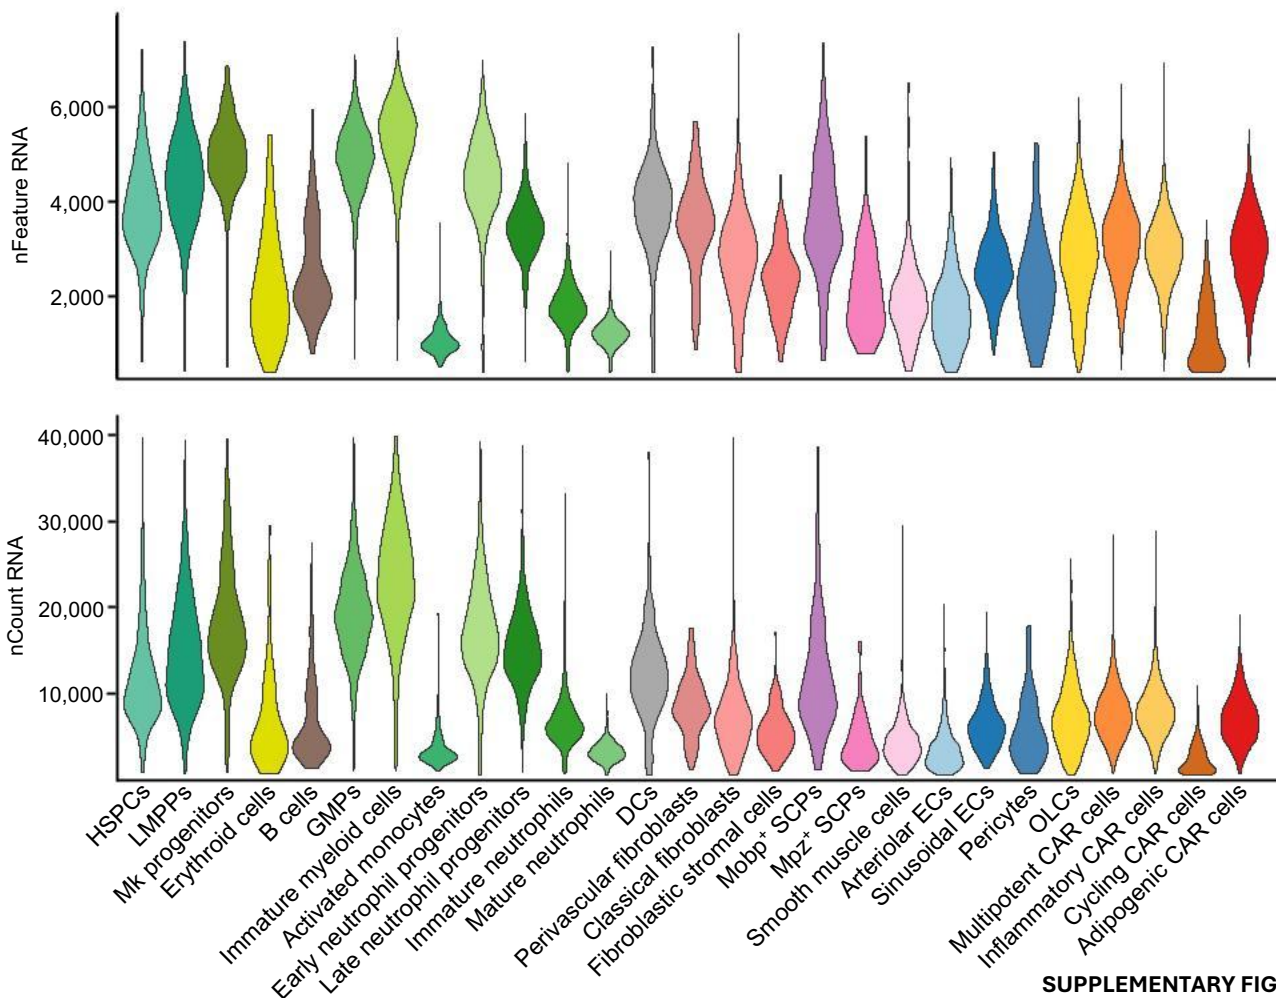

**K**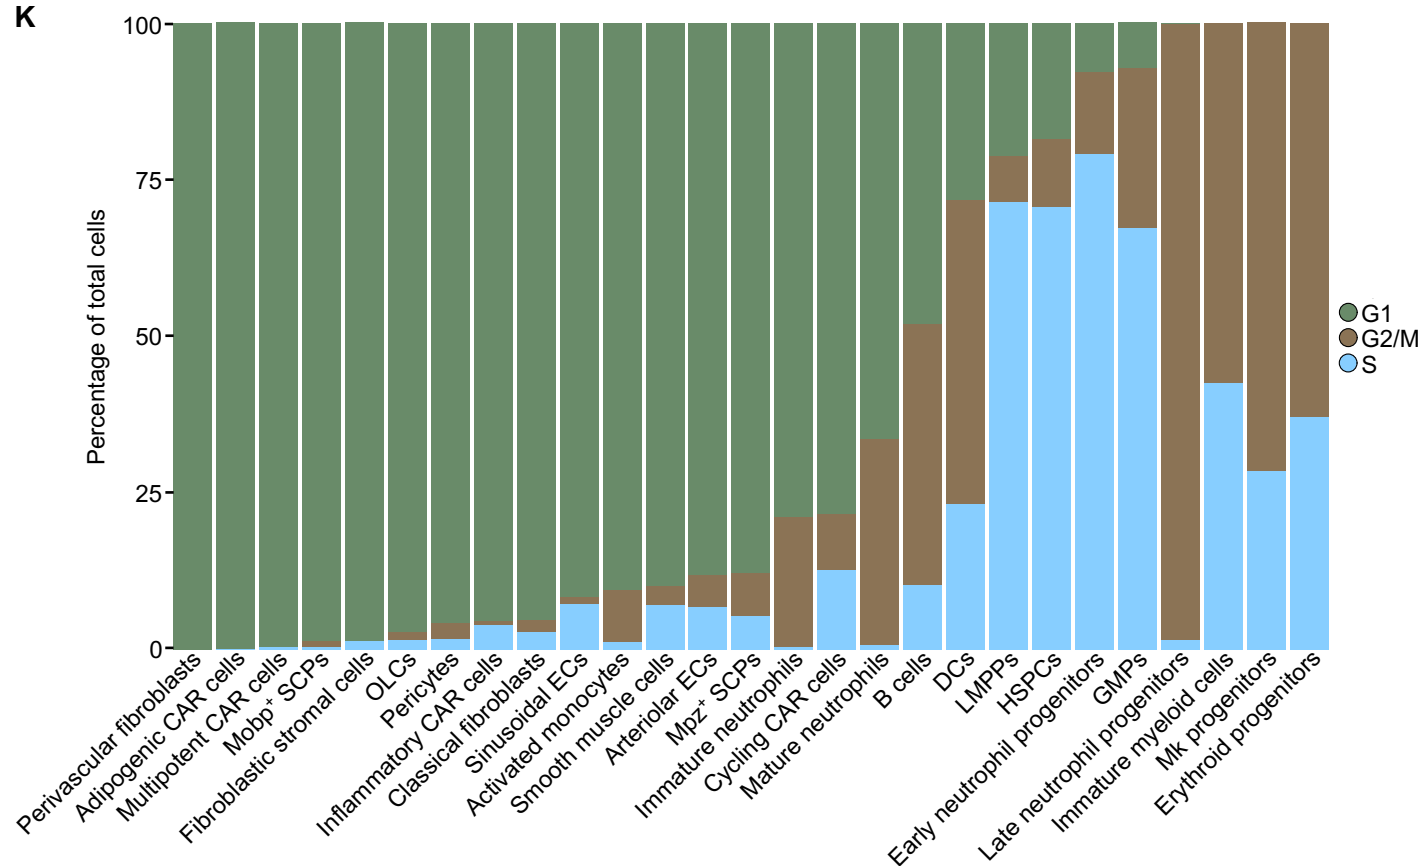**L**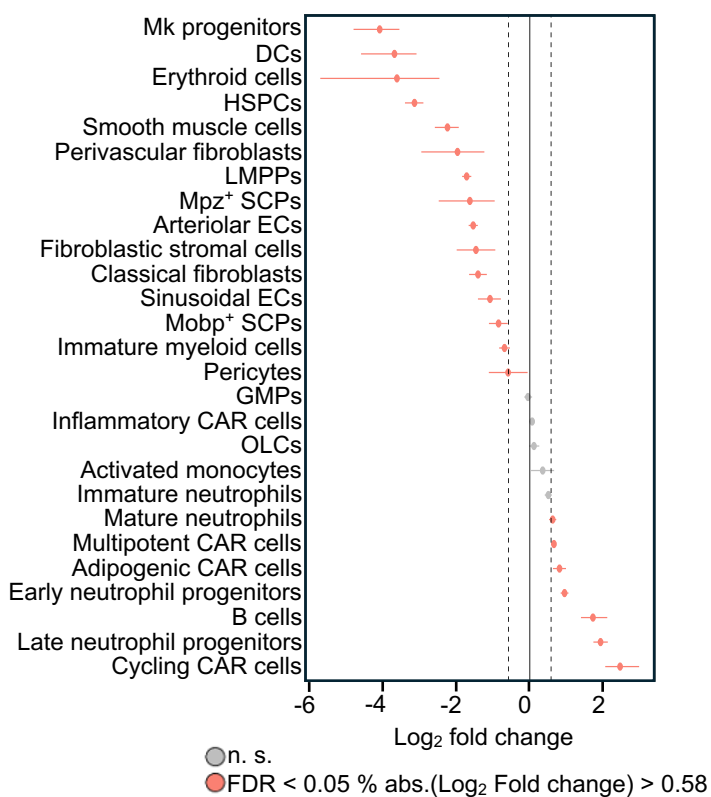**M**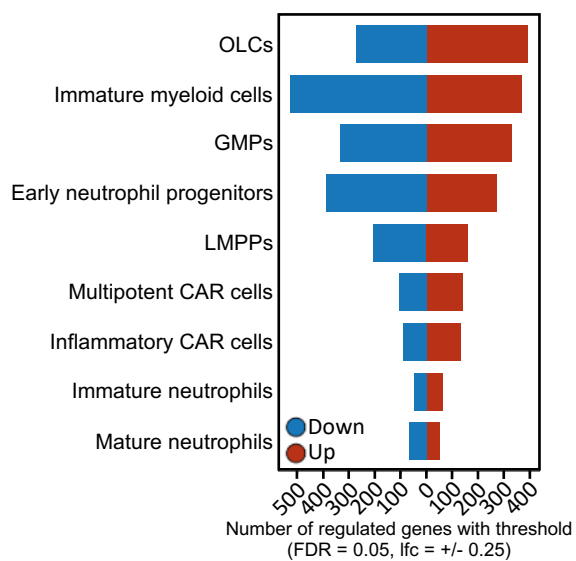

**A**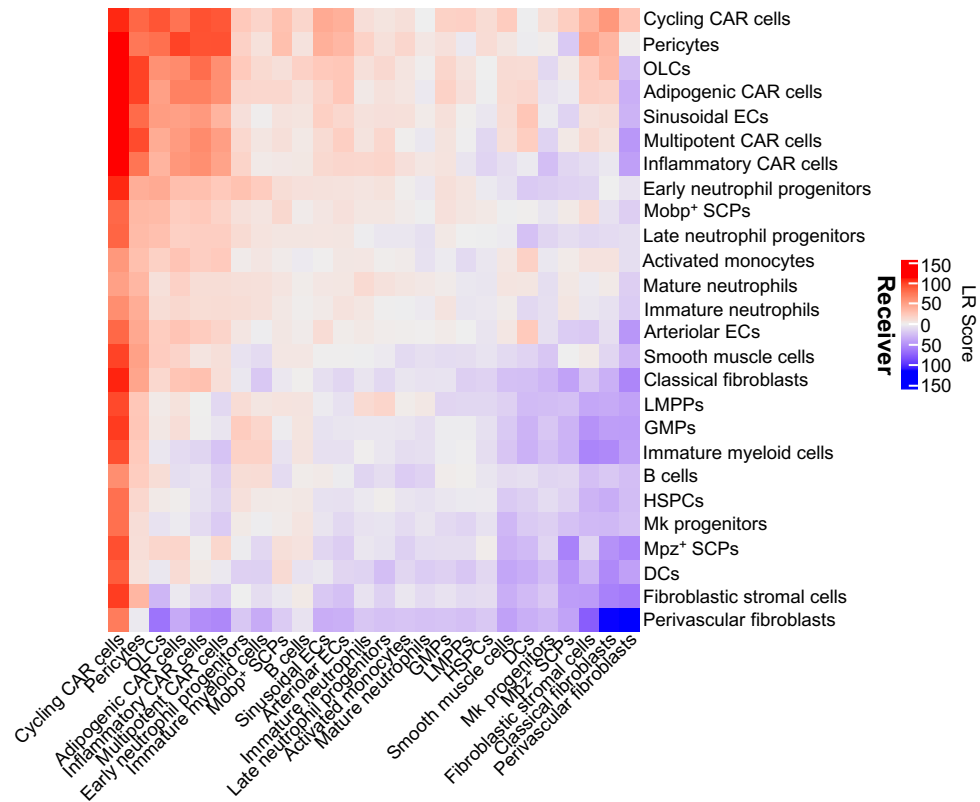**B**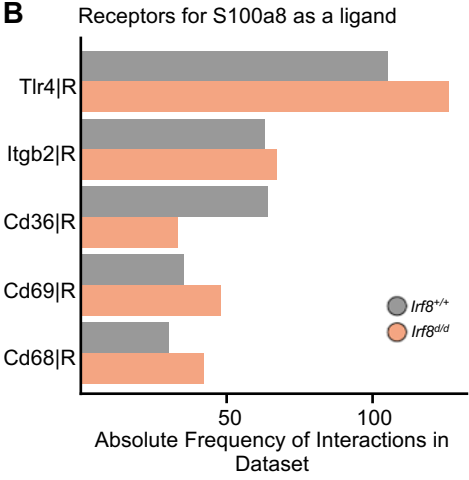**Sender****C**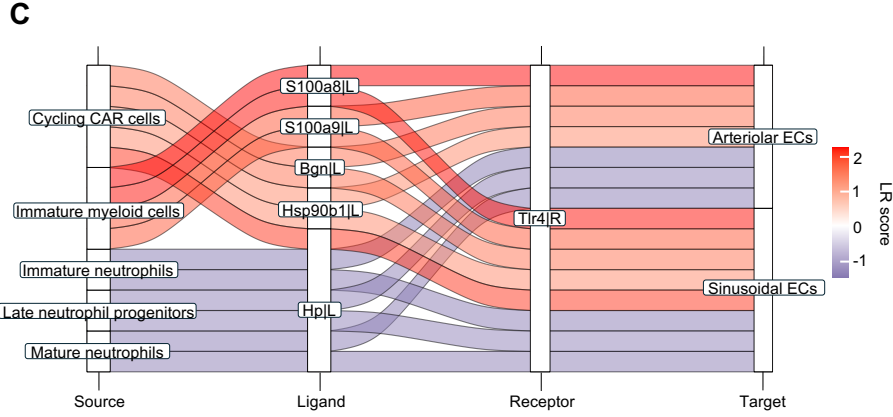**D**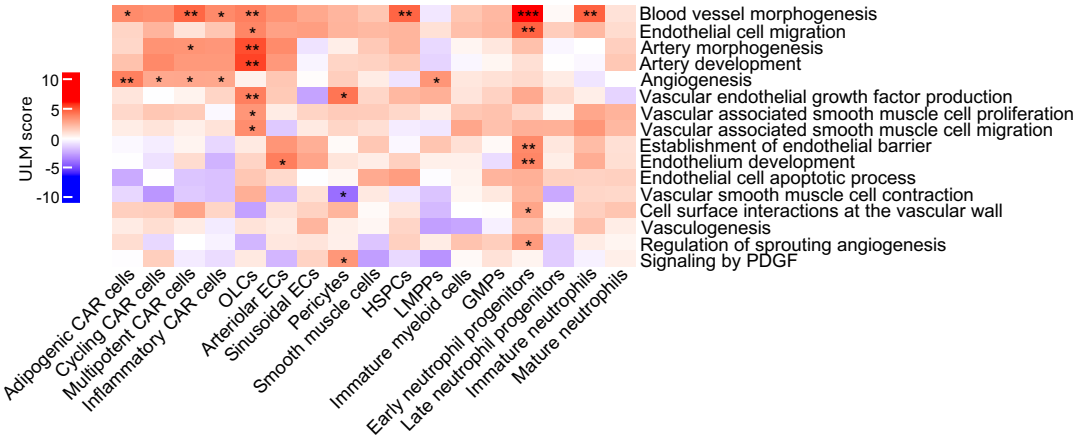

E

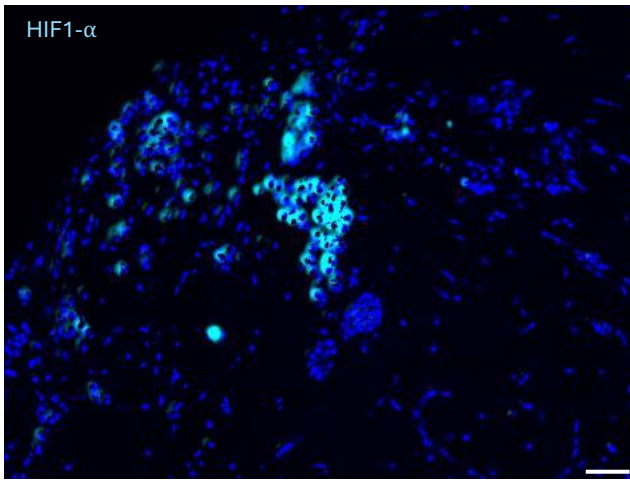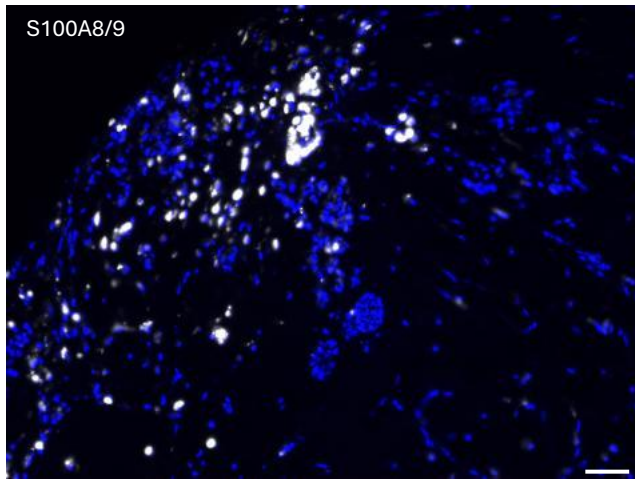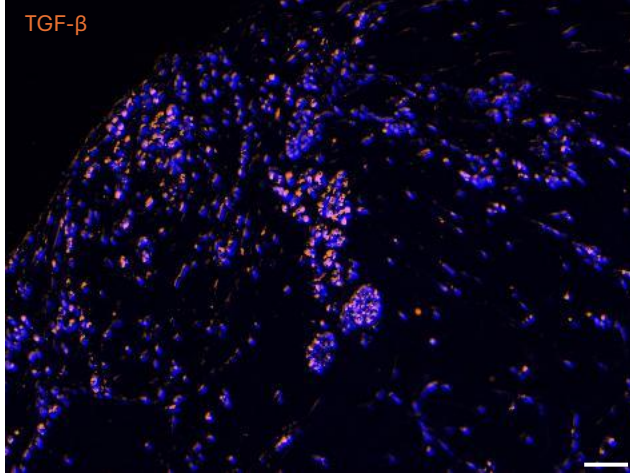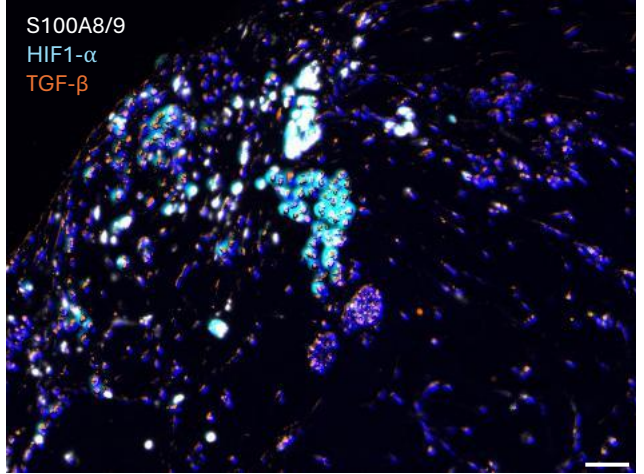

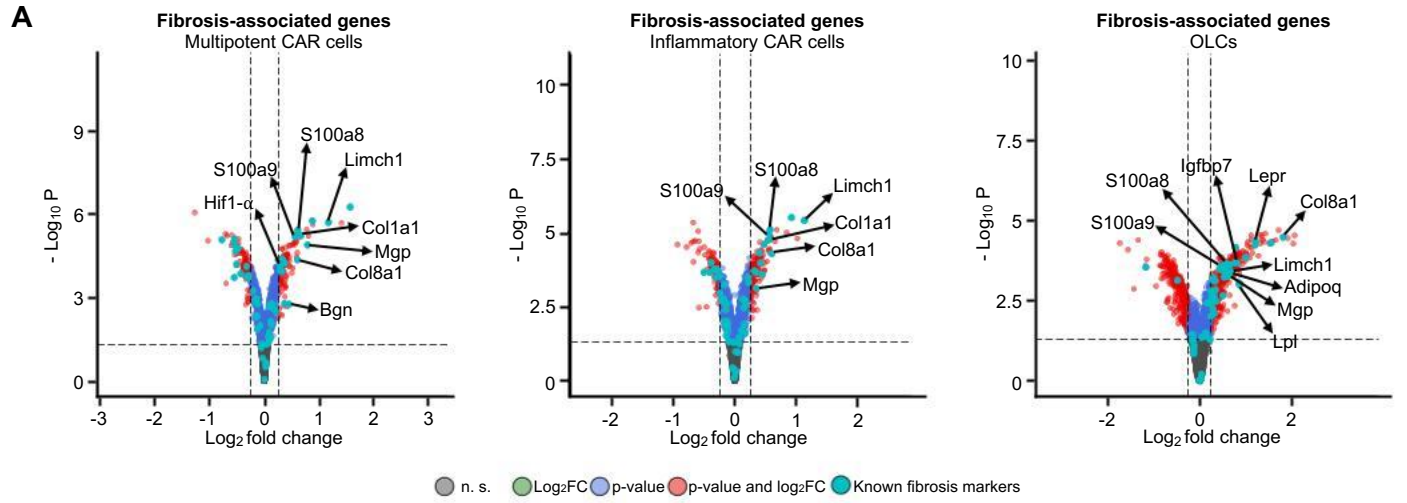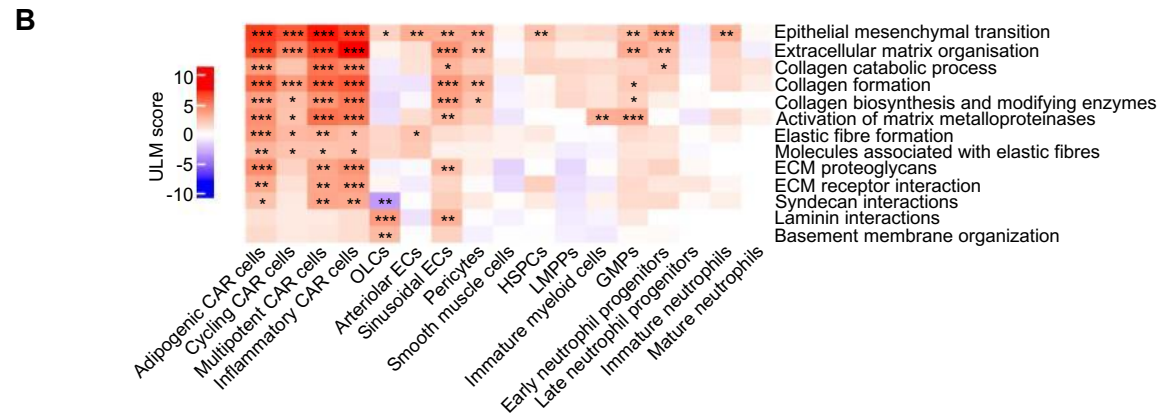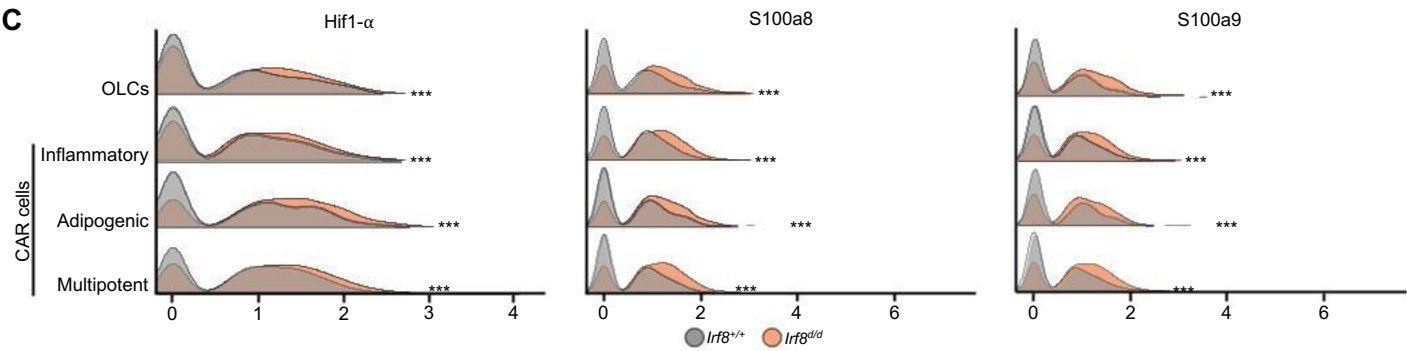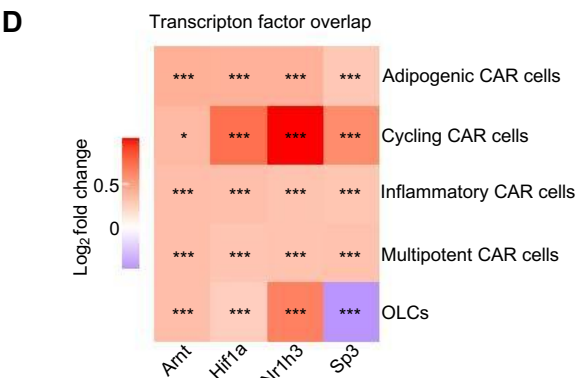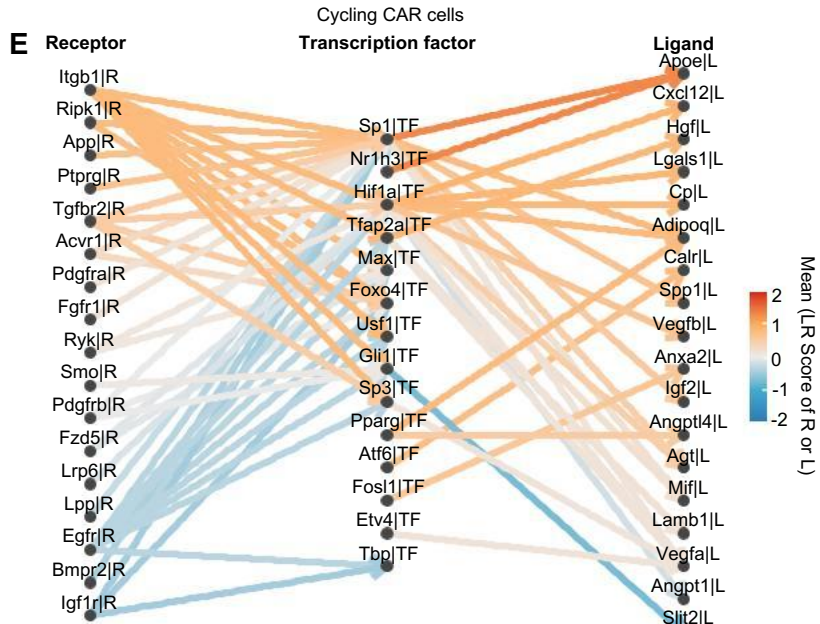

**F** *Irf8<sup>Δ/d</sup>* vs. *Irf8<sup>+/+</sup>* S100a8 and S100a9 combined

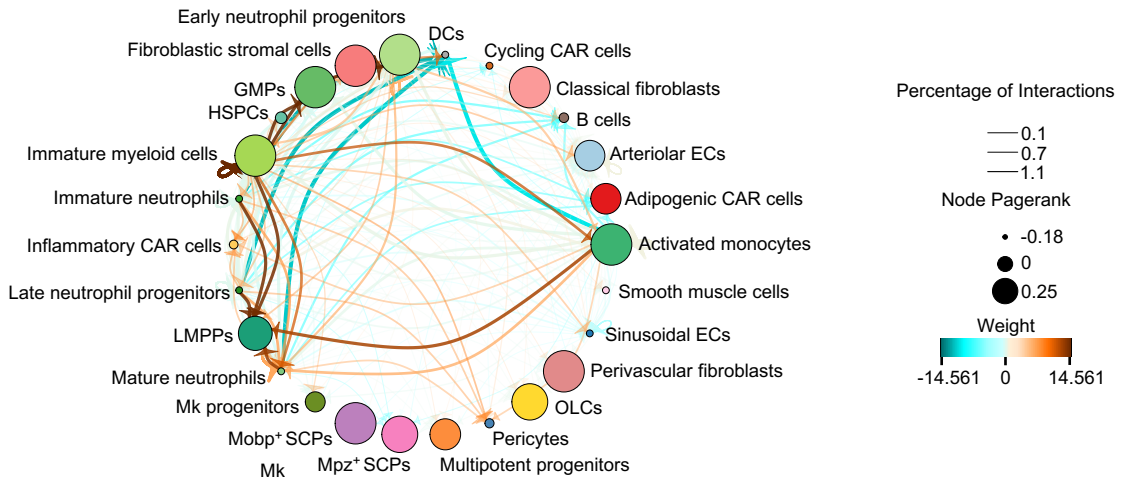

**G**

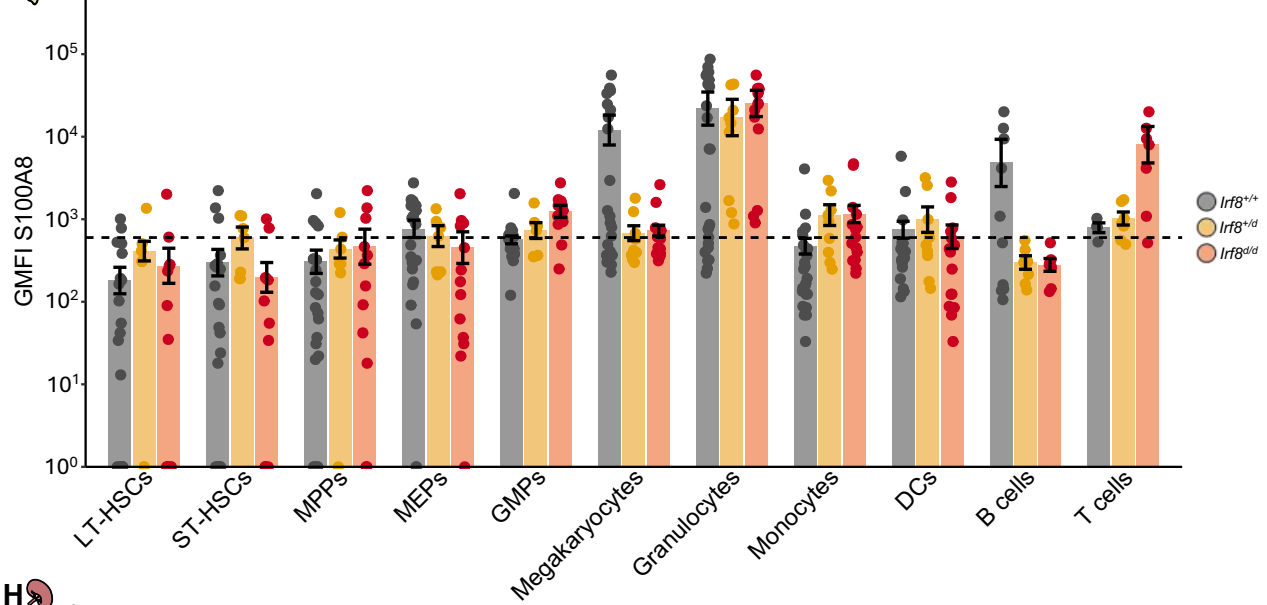

**H**

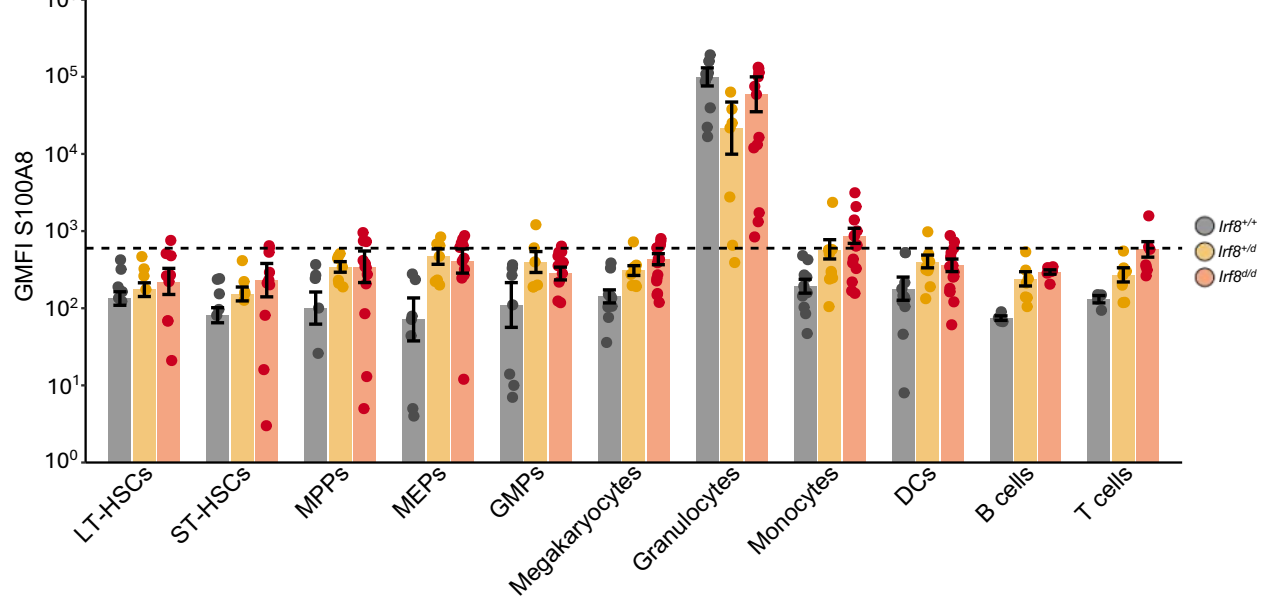

I

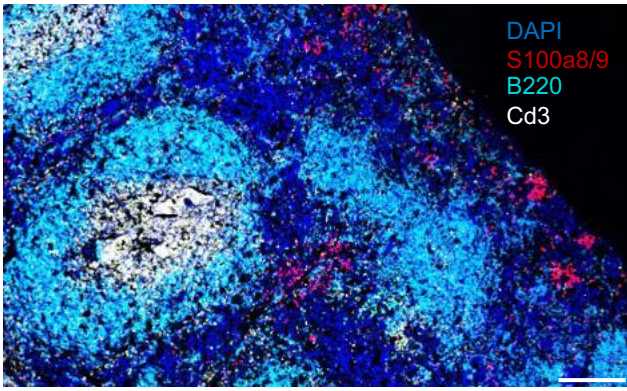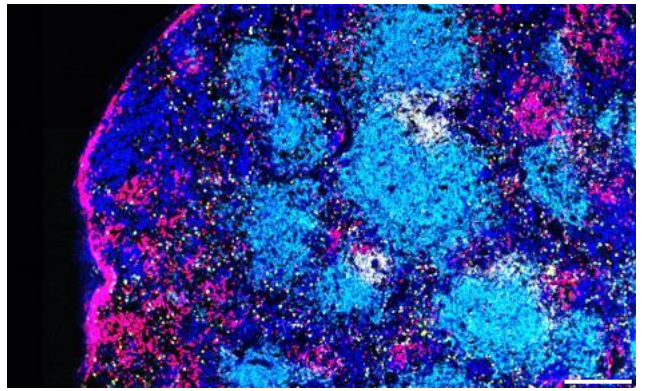

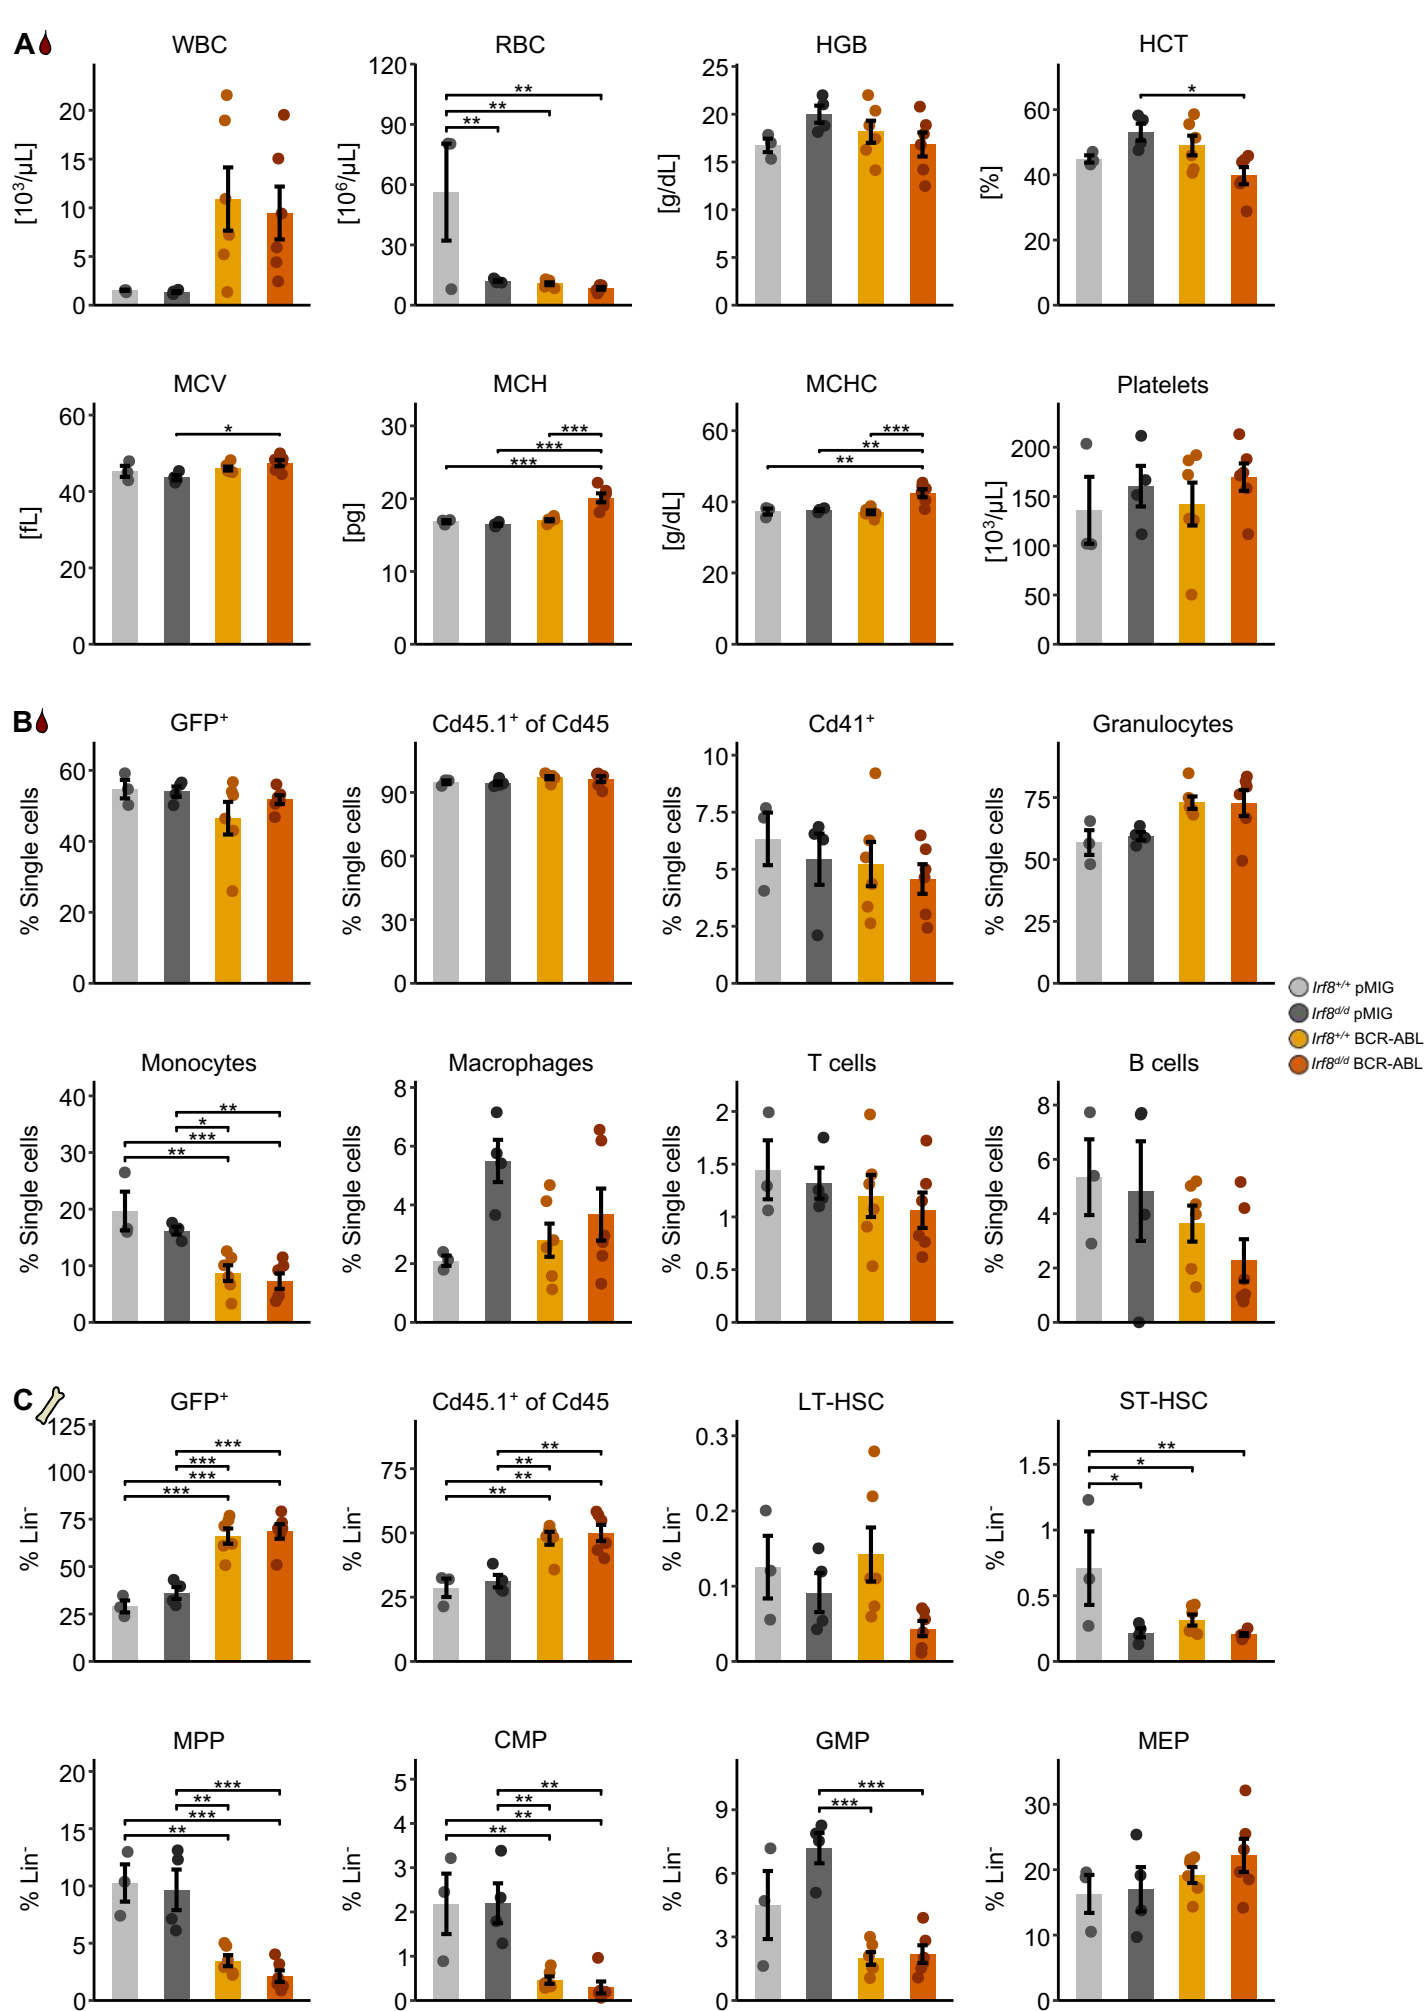

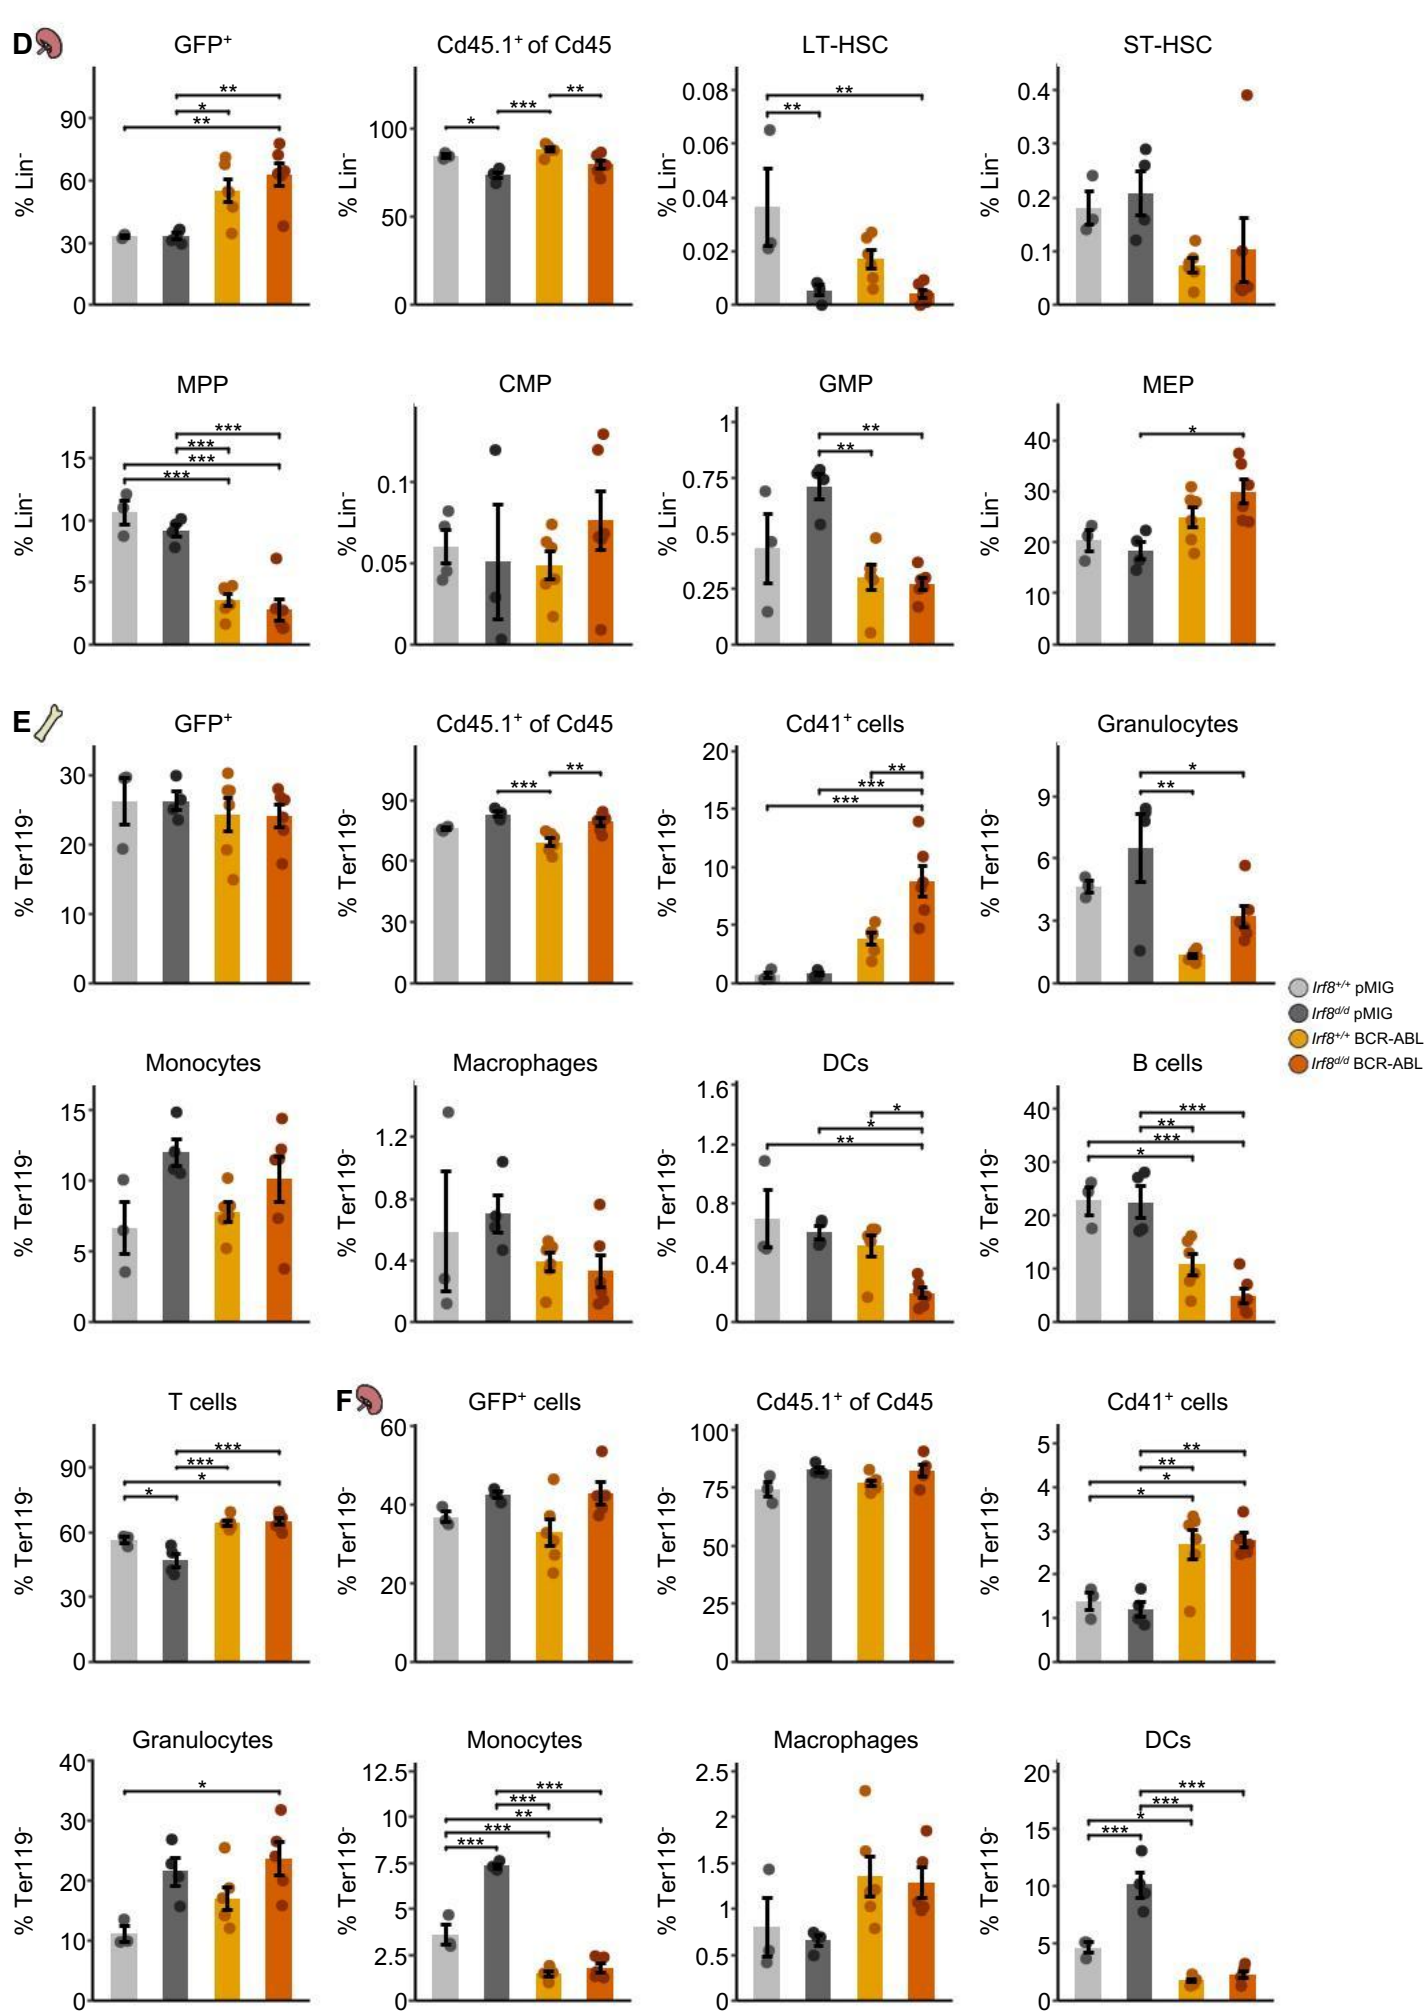

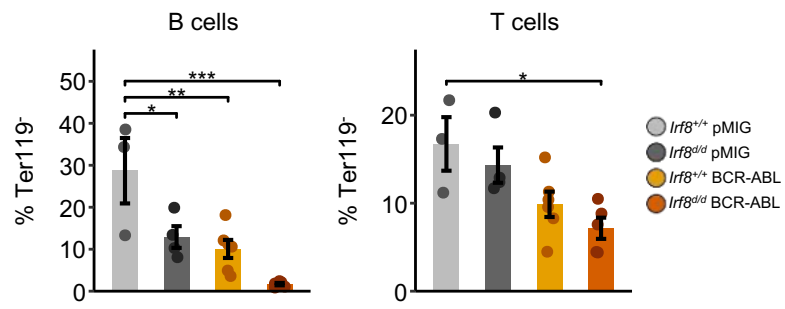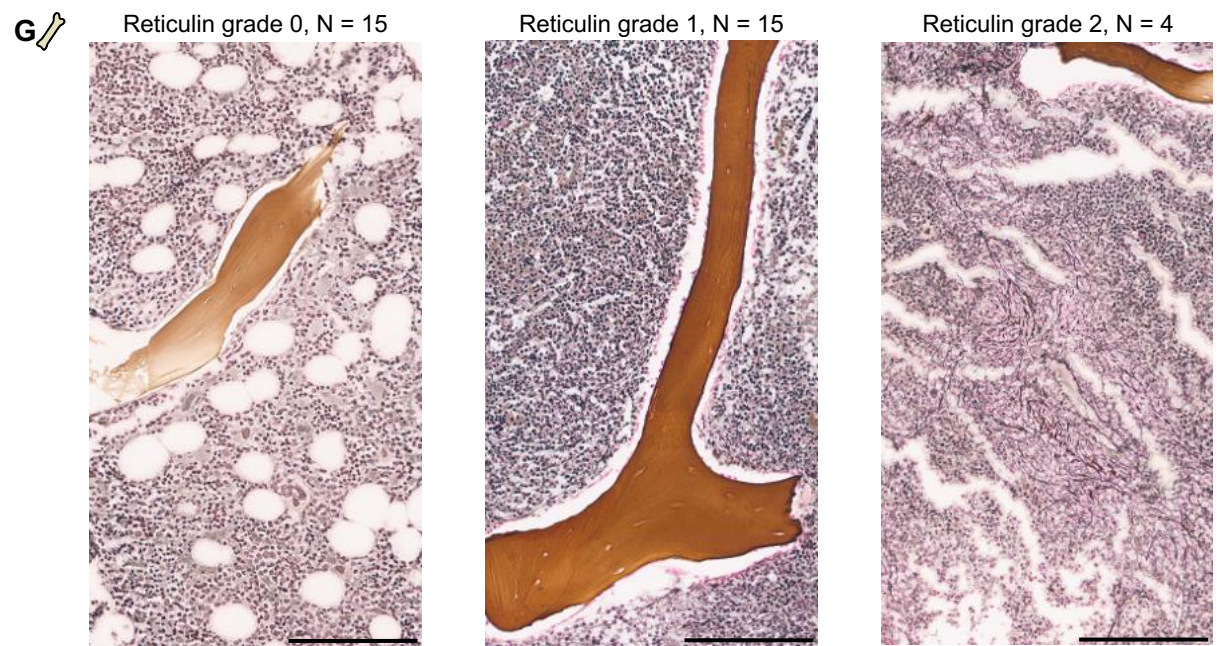

Supplement: Supplementary file 2 [file 64b659be8bb1dba1715892b4.pdf]
