# Supplementary material
Source: Research Square preprint supplement (doi:10.21203/rs.3.rs-9942483/v1)
Supplement: Supplementary file 1 [file 0f67ca36f06255ef0aebc4f8.pdf]

| REAGENT or RESOURCE                      | FLUOROCHROME                  | CLONE        | DILUTION | SOURCE                   | IDENTIFIER                         |
|------------------------------------------|-------------------------------|--------------|----------|--------------------------|------------------------------------|
| Viability dyes                           |                               |              |          |                          |                                    |
|                                          | AF700 Fixable Viability Stain | N/A          | 1:1,000  | BD Horizon               | Cat #564997, RRID: AB_2869637      |
|                                          | DAPI                          | N/A          | 1:10,000 | BioLegend                | Cat #422801                        |
| Anti-mouse antibodies for flow cytometry |                               |              |          |                          |                                    |
| ANTIGEN                                  | FLUOROCHROME                  | CLONE        | DILUTION | SOURCE                   | IDENTIFIER                         |
| goat anti-rabbit                         | AF488                         | polyclonal   | 1:500    | Thermo Fisher Scientific | Cat #A111034, RRID: AB_2576217     |
| AlpI                                     | unconjugated                  | SA40-00      | 1:50     | Novus Biologicals        | Cat #NBP2-67295, RRID: AB_3353583  |
| B220                                     | BV605                         | RA3-6B2      | 1:100    | BD Horizon               | Cat #563708, RRID: AB_2738383      |
| B220                                     | PB                            | RA3-6B2      | 1:100    | BioLegend                | Cat #103227, RRID: AB_492876       |
| CD106                                    | BV421                         | 429          | 1:200    | BD                       | Cat #740019, RRID: AB_2739791      |
| CD106                                    | BV605                         | MVCAM.A      | 1:200    | BD Biosciences           | Cat #745193, RRID: AB_2742789      |
| CD11b                                    | APC                           | M1/70        | 1:100    | BioLegend                | Cat #101212, RRID: AB_312795       |
| CD11b                                    | BV605                         | M1/70        | 1:400    | BD Horizon               | Cat #563015, RRID: AB_2737951      |
| CD11b                                    | eF450                         | M1/70        | 1:400    | eBioscience              | Cat #48-0112-82, RRID: AB_1582236  |
| CD11b                                    | PB                            | M1/70        | 1:100    | BioLegend                | Cat #101224, RRID: AB_755986       |
| CD11b                                    | BV711                         | M1/70        | 1:400    | BioLegend                | Cat #101242, RRID: AB_2563310      |
| CD115                                    | PE                            | AFS98        | 1:400    | Thermo Fisher Scientific | Cat #14-1152-82, RRID: AB_467428   |
| CD115                                    | PerCP-eF710                   | AFS98        | 1:400    | Thermo Fisher Scientific | Cat #46-1152-82, RRID: AB_10597740 |
| CD117                                    | AF700                         | 2B8          | 1:100    | BioLegend                | Cat #105845, RRID: AB_2783045      |
| CD117                                    | APC                           | 2B8          | 1:100    | BioLegend                | Cat #105812, RRID: AB_313221       |
| CD117                                    | PE-Cy7                        | ACK2         | 1:200    | BioLegend                | Cat #135112, RRID: AB_2131135      |
| Cd140a                                   | BV421                         | APA5         | 1:200    | BioLegend                | Cat #135923, RRID: AB_2814036      |
| CD140a                                   | PE-Cy7                        | APA5         | 1:200    | BioLegend                | Cat #135911, RRID: AB_2715973      |
| CD140a                                   | PerCP-cy5.5                   | APA5         | 1:200    | BioLegend                | Cat #135913, RRID: AB_2715986      |
| CD140b                                   | APC                           | APB5         | 1:100    | BioLegend                | Cat #136007, RRID: AB_2043971      |
| CD146                                    | AF488                         | ME-9F1       | 1:200    | BioLegend                | Cat #134707, RRID: AB_10641136     |
| CD146                                    | PerCP-cy5.5                   | ME-9F1       | 1:200    | BioLegend                | Cat #134709, RRID: AB_11204083     |
| CD150                                    | BV421                         | Q38-480      | 1:100    | BD Horizon               | Cat #566298, RRID: AB_2732006      |
| CD150                                    | PE-Cy7                        | TC15-12F12.2 | 1:100    | BioLegend                | Cat #115914, RRID: AB_439797       |
| CD157                                    | BV786                         | BP-3         | 1:400    | BD                       | Cat #741012, RRID: AB_2740634      |
| CD16/Cd32                                | BV786                         | 2.4G2        | 1:200    | BD                       | Cat #740851, RRID: AB_2740505      |
| CD16/Cd32                                | PE-Cy7                        | 2.4G2        | 1:200    | BD                       | Cat #560829, RRID: AB_3684973      |
| CD19                                     | biotinylated                  | 6D5          | 1:200    | BioLegend                | Cat #115504, RRID: AB_313639       |
| CD19                                     | PE-Cy5.5                      | 6D5          | 1:400    | SouthernBiotech          | Cat #1575-16, RRID: AB_2794957     |
| CD192                                    | BV786                         | 475301       | 1:400    | BD OptiBuild             | Cat #747966, RRID: AB_2872427      |
| CD21/35                                  | BV510                         | 7E9          | 1:200    | BioLegend                | Cat #123437, RRID: AB_2876441      |
| CD3                                      | PB                            | 17A2         | 1:400    | BioLegend                | Cat #100214, RRID: AB_493645       |
| CD3                                      | PE                            | 17A2         | 1:100    | BioLegend                | Cat #100206, RRID: AB_312663       |
| CD3e                                     | APC                           | 145-2C11     | 1:400    | BioLegend                | Cat #100312, RRID: AB_312677       |
| CD3e                                     | biotinylated                  | 145-2C11     | 1:200    | BioLegend                | Cat #100304, RRID: AB_312669       |
| CD3e                                     | BV605                         | 145-2C11     | 1:400    | BD Horizon               | Cat #563004, RRID: AB_2737945      |
| CD31                                     | BV711                         | 390          | 1:200    | BioLegend                | Cat #102449, RRID: AB_2860594      |
| CD34                                     | PE                            | SA376A4      | 1:100    | BioLegend                | Cat #152204, RRID: AB_2629648      |
| CD34                                     | PE-Cy7                        | SA376A4      | 1:200    | BioLegend                | Cat #152217, RRID: AB_2910311      |
| CD41                                     | AF700                         | MWReg30      | 1:200    | BioLegend                | Cat #133925, RRID: AB_2572129      |
| CD41                                     | APC-Cy7                       | MWReg30      | 1:100    | BioLegend                | Cat #133928, RRID: AB_2572132      |
| CD41                                     | PE                            | MWReg30      | 1:100    | BD Pharmingen            | Cat #558040, RRID: AB_397004       |
| CD41                                     | PE-Cy7                        | MWReg30      | 1:400    | BioLegend                | Cat #133916, RRID: AB_11124102     |
| CD45                                     | AF700                         | 30-F11       | 1:400    | BioLegend                | Cat #103127, RRID: AB_493714       |
| CD45                                     | APC-Cy7                       | 30-F11       | 1:400    | BioLegend                | Cat #103116, RRID: AB_312981       |
| CD45                                     | PB                            | 30-F11       | 1:400    | BioLegend                | Cat #103125, RRID: AB_493536       |
| CD45.1                                   | APC-Cy7                       | A20          | 1:400    | BioLegend                | Cat #110716, RRID: AB_313505       |
| CD45.1                                   | BV605                         | A20          | 1:100    | BioLegend                | Cat #110738, RRID: AB_2562565      |
| CD45.1                                   | BV786                         | A20          | 1:100    | BD OptiBuild             | Cat #740889, RRID: AB_2740538      |
| CD45.2                                   | AF700                         | 104          | 1:400    | BD Pharmingen            | Cat #560693, RRID: AB_1727491      |
| CD45.2                                   | PE                            | 104          | 1:400    | Thermo Fisher Scientific | Cat #12-0454-82, RRID: AB_465678   |
| CD45.2                                   | PerCP-Cy5.5                   | 104          | 1:100    | BioLegend                | Cat #109828, RRID: AB_893350       |
| CD48                                     | APC-Cy7                       | HM48-1       | 1:100    | BioLegend                | Cat #103432, RRID: AB_2561463      |
| CD51                                     | Pe-Cy7                        | RMV-7        | 1:200    | antibodies online        | Cat #ABIN7457640                   |
| CD56                                     | BV421                         | 809220       | 1:100    | BD Biosciences           | Cat #748094, RRID: AB_2872555      |
| CD63                                     | APC-Cy7                       | NVG-2        | 1:100    | BioLegend                | Cat #143907, RRID: AB_2565497      |
| CD63                                     | PerCP-Cy5.5                   | NVG-2        | 1:100    | BioLegend                | Cat #143912, RRID: AB_2565502      |
| F4/80                                    | APC                           | BM8          | 1:400    | BioLegend                | Cat #123116, RRID: AB_893481       |
| F4/80                                    | PE-Cy7                        | BM8          | 1:100    | Sony Biotechnology       | Cat #1215570, RRID: AB_3083438     |
| Gr-1                                     | AF700                         | RB6-8C5      | 1:100    | BioLegend                | Cat #108421, RRID: AB_493728       |
| Gr-1                                     | biotinylated                  | RB6-8C5      | 1:100    | BD Pharmingen            | Cat #553125, RRID: AB_394641       |
| Gr-1                                     | BV605                         | RB6-8C5      | 1:100    | BD Biosciences           | Cat #563229, RRID: AB_2738126      |
| Gr-1                                     | PB                            | RB6-8C5      | 1:400    | BioLegend                | Cat #108430, RRID: AB_893556       |
| Gr-1                                     | PerCP-cy5.5                   | RB6-8C5      | 1:400    | BioLegend                | Cat #108428, RRID: AB_893558       |
| Lamp1                                    | AF488                         | 1D4B         | 1:200    | BioLegend                | Cat #121607, RRID: AB_571982       |

|                                         |                            |               |          |                             |                                    |
|-----------------------------------------|----------------------------|---------------|----------|-----------------------------|------------------------------------|
| Lamp1                                   | PerCP-Cy5.5                | 1D4B          | 1:200    | BioLegend                   | Cat #121626, RRID: AB_2572055      |
| Ly6C                                    | AF700                      | HK1.4         | 1:400    | BioLegend                   | Cat #128023, RRID: AB_10640119     |
| Ly6C                                    | APC-Fire750                | HK1.4         | 1:200    | BioLegend                   | Cat #128046, RRID: AB_2616731      |
| Ly6G                                    | biotinylated               | 1A8           | 1:200    | eBioscience                 | Cat #13-9668-82, RRID: AB_2815061  |
| Ly6G                                    | PE-CF594                   | 1A8           | 1:400    | BD Horizon                  | Cat #562700, RRID: AB_2737730      |
| Lepr                                    | biotinylated               | polyclonal    | 1:200    | R&D systems                 | Cat #BAF497, RRID: AB_2296953      |
| Madcam1                                 | APC                        | MECA-367      | 1:200    | BioLegend                   | Cat #120711, RRID: AB_2629561      |
| Mhcll                                   | BV786                      | M5/114.15.2   | 1:1,000  | BioLegend                   | Cat #107645, RRID: AB_2565977      |
| Mhcll                                   | PerCP-Cy5.5                | M5/114.15.2   | 1:100    | BioLegend                   | Cat #107625, RRID: AB_2191072      |
| NG2                                     | PE                         | 1E6.4         | 1:50     | Miltenyi Biotec             | Cat #130-123-964, RRID: AB_2889409 |
| Nk1.1                                   | biotinylated               | PK136         | 1:200    | BioLegend                   | Cat #108704, RRID: AB_313391       |
| PDPN                                    | APC-Cy7                    | 8.1.1         | 1:200    | BioLegend                   | Cat #127418, RRID: AB_2629804      |
| PDPN                                    | Pe-Cy7                     | 8.1.1         | 1:200    | BioLegend                   | Cat #127411, RRID: AB_10613294     |
| rabbit                                  | AF488                      | polyclonal    | 1:500    | Thermo Fisher Scientific    | Cat #A11034, RRID: AB_2576217      |
| S100A8                                  | unconjugated               | ERP3554       | 1:200    | abcam                       | Cat #ab92331, RRID: AB_2050283     |
| Sca-1                                   | APC-Cy7                    | D7            | 1:200    | BD Pharmingen               | Cat #560654, RRID: AB_1727552      |
| Sca-1                                   | BV786                      | D7            | 1:100    | BioLegend                   | Cat #108139, RRID: AB_2565957      |
| Sca-1                                   | PerCP-Cy5.5                | E13-161.7     | 1:100    | BioLegend                   | Cat #122524, RRID: AB_893617       |
| Streptavidin                            | PE Dazzle 594              | not specified | 1:400    | BioLegend                   | Cat #405247, RRID: AB_3697286      |
| Ter119                                  | AF700                      | TER-119       | 1:400    | BioLegend                   | Cat #116220, RRID: AB_528963       |
| Ter119                                  | biotinylated               | TER-119       | 1:200    | eBioscience                 | Cat #13-5921-82, RRID: AB_466797   |
| Ter119                                  | BV711                      | TER-119       | 1:400    | BD OptiBuild                | Cat #740686, RRID: AB_2740372      |
| Ter119                                  | PB                         | TER-119       | 1:200    | BioLegend                   | Cat #116232, RRID: AB_2251160      |
| Anti-mouse antibodies for cell sorting  |                            |               |          |                             |                                    |
| Antigen                                 | FLUOROCHROME               | CLONE         | DILUTION | SOURCE                      | IDENTIFIER                         |
| CD150                                   | PE-Cy7                     | TC15-12F12.2  | 1:200    | BioLegend                   | Cat #115914, RRID: AB_439797       |
| CD19                                    | biotinylated               | 6D5           | 1:200    | BioLegend                   | Cat #115504, RRID: AB_313639       |
| CD19                                    | PB                         | 6D5           | 1:200    | BioLegend                   | Cat #115526, RRID: AB_493341       |
| CD3e                                    | biotinylated               | 145-2C11      | 1:200    | eBioscience                 | Cat #13-0031-82, RRID: AB_466319   |
| CD3e                                    | BV421                      | 145-2C11      | 1:200    | BioLegend                   | Cat #100335, RRID: AB_10898314     |
| CD31                                    | PE                         | MEC 13.3      | 1:200    | BioLegend                   | Cat #102507, RRID: AB_312915       |
| CD45                                    | APC-Cy7                    | 30-F11        | 1:400    | BioLegend                   | Cat #103116, RRID: AB_312981       |
| CD71                                    | BV421                      | RI7217        | 1:200    | BioLegend                   | Cat #113813, RRID: AB_10899739     |
| Gr-1                                    | biotinylated               | RB6-8C5       | 1:200    | BioLegend                   | Cat #108404, RRID: AB_313369       |
| Ly6G                                    | FITC                       | 1A8           | 1:200    | BioLegend                   | Cat #127606, RRID: AB_1236494      |
| Mhcll                                   | BV786                      | M5/114.15.2   | 1:1,000  | BioLegend                   | Cat #107645, RRID: AB_2565977      |
| Nk1.1                                   | biotinylated               | PK136         | 1:200    | BioLegend                   | Cat #108704, RRID: AB_313391       |
| Sca-1                                   | BV786                      | D7            | 1:100    | BioLegend                   | Cat #108139, RRID: AB_2565957      |
| Streptavidin                            | PerCP-Cy5.5                | N/A           | 1:500    | BD Pharmingen               | Cat #551419, RRID: AB_2868934      |
| Ter119                                  | biotinylated               | TER-119       | 1:200    | eBioscience                 | Cat #13-5921-82, RRID: AB_466797   |
| Ter119                                  | PB                         | TER-119       | 1:400    | BioLegend                   | Cat #116232, RRID: AB_2251160      |
| Anti-mouse antibodies for CODEX imaging |                            |               |          |                             |                                    |
| ANTIGEN                                 | OLIGO SEQUENCE (5' F → 3') | CLONE         | DILUTION | SOURCE                      | IDENTIFIER                         |
| alpha-SMA                               | GTGAAACGGCAGC AF750        | 1A4           | 1:200    | abcam                       | Cat #ab240654, RRID: AB_2922779    |
| beta-Catenin                            | Atto 550                   | N/A           | 1:100    | Akoya Biosciences           | Cat #AKYP0068, RRID: AB_3082978    |
| B220                                    | CACTTTGCCGTGC AF750        | RA3-6B2       | 1:100    | BioLegend                   | Cat #103202, RRID: AB_312987       |
| C3                                      | TCGTGCAAGCAAAT Cy5         | 11H9          | 1:100    | Novus Biologicals           | Cat #NB200-540                     |
| Caveolin                                | AF750                      | D46G3         | 1:100    | Akoya Biosciences           | Cat #AKYP0115, RRID: AB_3662763    |
| CD106                                   | GTAGTCCTAAACCAT AF750      | 429 (MVCAM.A) | 1:100    | BioLegend                   | Cat #105702, RRID: AB_313203       |
| CD117                                   | GTGCGAGTTGACCT Cy3         | polyclonal    | 1:250    | Novus Biologicals           | Cat #AF1356, RRID: AB_354750       |
| CD11c                                   | CGCTCCTCATGATAA Cy5        | N418          | 1:100    | BioLegend                   | Cat #117301, RRID: AB_313770       |
| CD146                                   | ACGAGTGTATAACCC Cy5        | EPR3208       | 1:100    | Abcam                       | Cat #ab210072, RRID: AB_3081922    |
| CD150                                   | GAATATTCATCTGCG Cy5        | polyclonal    | 1:100    | antibodies online           | Cat #ABIN74968                     |
| CD157                                   | TACGTTAGTGGACCA Cy5        | BP-3          | 1:100    | BioLegend                   | Cat #140202, RRID: AB_10639943     |
| CD169                                   | AACGACCATGTGACC AF750      | 3D6.112       | 1:100    | BioLegend                   | Cat #142402, RRID: AB_10916523     |
| CD21/35                                 | GCTGGGGTGA Cy5             | 7E9           | 1:100    | BioLegend                   | Cat #123429, RRID: AB_2888728      |
| CD3                                     | AAATACGAAATCCGC AF750      | 17A2          | 1:100    | BioLegend                   | Cat #100202, RRID: AB_312659       |
| CD31                                    | ATTTTCCCGCAGC Cy5          | MEC13.3       | 1:100    | BioLegend                   | Cat #102502, RRID: AB_312909       |
| CD34                                    | CGCGGAGGAGTA Cy5           | EP373Y        | 1:100    | abcam                       | Cat #ab198395, RRID: AB_2889381    |
| CD45                                    | AACCAAAGCAGTA AF750        | 30-F11        | 1:100    | BioLegend                   | Cat #103102, RRID: AB_312967       |
| CD61                                    | GAGACCATCCTACAT AF750      | ERP17507      | 1:100    | abcam                       | Cat #ab240214, RRID: AB_3076749    |
| CD68                                    | TAAAAGGCGTGC Cy3           | FA-11         | 1:100    | abcam                       | Cat #ab237968, RRID: AB_3086750    |
| CD71                                    | CGAGAGACTGAATCT AF750      | RI7217        | 1:100    | BioLegend                   | Cat #113802, RRID: AB_313563       |
| CD8a                                    | TGATTCGCTCATGTG AF750      | 53-6.7        | 1:100    | BioLegend                   | Cat #100702, RRID: AB_312741       |
| CD90                                    | TAGCATTGTGTAGGT AF750      | G7            | 1:100    | BioLegend                   | Cat #105202, RRID: AB_313169       |
| CXCL12                                  | AACTGCCGG Cy5              | 79018         | 1:100    | R&D systems                 | Cat #MAB350-100, RRID: AB_2088149  |
| CXCL13                                  | CTTCAAATGCCCTAT Cy5        | polyclonal    | 1:100    | Invitrogen                  | Cat #PA5-79106, RRID: AB_2746222   |
| Collagen I                              | CTCAGGTTCCGAGTC Cy5        | E8F4L         | 1:200    | Cell Signaling Technologies | Cat #81375SF, RRID: AB_3083034     |
| Collagen IV                             | GCTCTCTGACTTAGA Cy3        | polyclonal    | 1:100    | abcam                       | Cat #ab6586, RRID: AB_305584       |
| Endomucin                               | ATGCAATCACCTGGT Cy3        | V.7C7         | 1:50     | Santa Cruz Biotechnology    | Cat #sc-65495, RRID: AB_2100037    |
| F4/80                                   | GCCTTCGTCGTG AF750         | BM8           | 1:100    | BioLegend                   | Cat #123102, RRID: AB_893506       |
| ICAM1                                   | CGGTCAAGTTGGTT Cy5         | ERP22161-284  | 1:100    | abcam                       | Cat #ab222736, RRID: AB_3697845    |

|                                                              |                          |             |          |                                     |                                  |
|--------------------------------------------------------------|--------------------------|-------------|----------|-------------------------------------|----------------------------------|
| Ly6C                                                         | GAAGTCCATAATAAGC Cy5     | HK1.4       | 1:100    | BioLegend                           | Cat #128002, RRID: AB_1134214    |
| Ly6G                                                         | ATCCGTCGGGTT AF750       | 1A8         | 1:100    | BioLegend                           | Cat #127602, RRID: AB_1089180    |
| MadCAM1                                                      | CGACAGCAGTTTTGT Cy5      | MECA-367    | 1:100    | BioLegend                           | Cat #120702, RRID: AB_493393     |
| MHCII                                                        | AACAATATTTGTTGAAAT AF750 | M5/114.15.2 | 1:100    | BioLegend                           | Cat #107602, RRID: AB_313317     |
| Osteopontin                                                  | CTTAGAATATCTTAGCG Cy3    | polyclonal  | 1:100    | R&D systems                         | Cat #AF808, RRID: AB_2194992     |
| Podoplanin                                                   | TATTCGGGAATAAGA Cy5      | 8.1.1       | 1:100    | BioLegend                           | Cat #127402, RRID: AB_1089187    |
| S100A8/9                                                     | TGACGACCACAG Cy5         | RM1038      | 1:200    | abcam                               | Cat #ab288578                    |
| Sca-1                                                        | TGGCATTCTGGC Cy5         | D7          | 1:100    | eBioscience                         | Cat #14-5981-82, RRID: AB_467778 |
| Sodium-potassium ATPase                                      | ACTCTCTTAAGCTAATT Cy3    | EP1845Y     | 1:100    | abcam                               | Cat #ab167390, RRID: AB_2890241  |
| Ter119                                                       | ACCACTCCGGC AF750        | TER-119     | 1:100    | BioLegend                           | Cat #116202, RRID: AB_313703     |
| TGFb1                                                        | ACTCTGTAATAATTTATC Cy3   | ERP21143    | 1:50     | abcam                               | Cat #ab229856, RRID: AB_3080868  |
| Vimentin                                                     | TGGTGCCCG AF750          | RV202       | 1:100    | BD Biosciences                      | Cat #550513, RRID: AB_393716     |
| Anti-mouse antibodies for immunofluorescence                 |                          |             |          |                                     |                                  |
| ANTIGEN                                                      | FLUOROCHROME             | CLONE       | DILUTION | SOURCE                              | IDENTIFIER                       |
| a-SMA                                                        | unconjugated             | 1A4         | 1:400    | R&D systems                         | Cat #MAB1420, RRID: AB_262054    |
| CD42a                                                        | FITC                     | Xia.B4      | 1:100    | Emfret                              | Cat #M051-1, RRID: AB_2827529    |
| CD61                                                         | unconjugated             | ERP17507    | 1:500    | abcam                               | Cat #ab179473, RRID: AB_2917988  |
| Collagen I                                                   | unconjugated             | E8F4L       | 1:200    | Cell Signalling Technology          | Cat #81375SF, RRID: AB_3083034   |
| Endomucin                                                    | unconjugated             | V.7C7       | 1:100    | Santa Cruz Biotechnology            | Cat #sc-65495, RRID: AB_2100037  |
| Ly6G                                                         | AF700                    | 1A8         | 1:100    | BioLegend                           | Cat #127621, RRID: AB_10640452   |
| Antibodies for ChIP sequencing                               |                          |             |          |                                     |                                  |
| ANTIBODY                                                     |                          |             |          | SOURCE                              | IDENTIFIER                       |
| IRF8 antibody                                                |                          |             |          | Bethyl Laboratories                 | Cat #A304-027A                   |
| Rabbit IgG control                                           |                          |             |          | Diagenode                           | Cat #kch-504-250                 |
| Chemicals, peptides and recombinant proteins                 |                          |             |          |                                     |                                  |
| REAGENT or RESOURCE                                          |                          |             |          | SOURCE                              | IDENTIFIER                       |
| 1-Thioglycerin                                               |                          |             |          | Sigma-Aldrich                       | Cat #M1753                       |
| 2-Mercaptoethanol                                            |                          |             |          | hermo Fisher Scientific             | Cat #31350010                    |
| 4-Hydroxytamoxifen                                           |                          |             |          | Merck                               | Cat #H6278-10MG                  |
| Accutase                                                     |                          |             |          | Pan Biotech                         | Cat #P10-21500                   |
| Anti-biotin MicroBeads                                       |                          |             |          | Miltenyi Biotec                     | Cat #130-090-485                 |
| Antibody Diluent                                             |                          |             |          | Zytomed Systems                     | Cat #ZUC025-100                  |
| Antigen unmasking solution                                   |                          |             |          | Vector Laboratories                 | Cat #H-3300-250                  |
| Ascorbic Acid                                                |                          |             |          | STEMCELL Technologies               | Cat #72132                       |
| CD34 MicroBead Kit UltraPure, human                          |                          |             |          | Miltenyi Biotec                     | cat# #130-100-453                |
| CD45 MicroBeads, mouse                                       |                          |             |          | Miltenyi Biotec                     | Cat #130-052-301                 |
| Chemically Defined Lipid Concentrate                         |                          |             |          | Gibco                               | Cat #11905031                    |
| CHIR99021                                                    |                          |             |          | Merck                               | Cat #SML 1046                    |
| Chondroitin sulfate salt from shark cartilage polymers [CSC] |                          |             |          | Sigma-Aldrich                       | Cat #27045                       |
| Collagen I                                                   |                          |             |          | Corning                             | Cat #354236                      |
| Collagenase, Type II                                         |                          |             |          | Thermo Fisher Scientific            | Cat #17101-015                   |
| Collagenase D                                                |                          |             |          | Roche                               | Cat #11088866001                 |
| Dispase II                                                   |                          |             |          | Sigma-Aldrich                       | Cat #D4693                       |
| DMEM                                                         |                          |             |          | Gibco                               | Cat #41995-039                   |
| DNase I                                                      |                          |             |          | Worthington Biochemical Corporation | Cat #LS002139                    |
| Dynabeads Protein G                                          |                          |             |          | Thermo Fisher Scientific            | Cat #10009D                      |
| Entkalker Soft Solvagreen                                    |                          |             |          | Carl Roth                           | Cat #6484.4                      |
| Formaldehyde solution, 37% stock                             |                          |             |          | Sigma-Aldrich                       | Cat #1.04003                     |
| Geltrex                                                      |                          |             |          | Gibco                               | Cat #15627578                    |
| GlutaMAX Supplement                                          |                          |             |          | Gibco                               | Cat #35050061                    |
| Ham's F-12 Nutrient Mix                                      |                          |             |          | Gibco                               | Cat #11765054                    |
| Hematoxylin solution, Gill No.1                              |                          |             |          | Sigma-Aldrich                       | Cat #GHS132                      |
| Heparin sodium salt from porcine intestinal mucosa           |                          |             |          | Merck                               | Cat #H3149                       |
| Hexadimethrinbromid (Polybrene)                              |                          |             |          | Sigma-Aldrich                       | Cat #TR-1003                     |
| Human holo-Transferrin                                       |                          |             |          | Sigma-Aldrich                       | Cat #T0665                       |
| Human BMP-4                                                  |                          |             |          | Miltenyi Biotec                     | Cat #130-111-168                 |
| Human Collagen Type IV                                       |                          |             |          | Cell Systems                        | Cat #5022-5MG                    |
| Human FGF basic ((FGF-2/bFGF)                                |                          |             |          | PreproTech                          | Cat #100-18B                     |
| Human Flt-3 Ligand (FLT3L) Recombinant Protein               |                          |             |          | PreproTech                          | Cat #300-19-250                  |
| Human M-CSF Recombinant Protein                              |                          |             |          | PreproTech                          | Cat #300-25                      |
| Human Recombinant IL-6                                       |                          |             |          | STEMCELL Technologies               | Cat #78050                       |
| Human SCF                                                    |                          |             |          | Miltenyi Biotec                     | Cat #130-096-692                 |
| Human VEGF                                                   |                          |             |          | Miltenyi Biotec                     | Cat #130-109-385                 |
| Hyper-IL6                                                    |                          |             |          | gift from Dr. Rose-John             | N/A                              |
| IMDM                                                         |                          |             |          | Gibco                               | Cat #12440053                    |
| KnockOut Serum Replacement                                   |                          |             |          | Gibco                               | Cat #10828010                    |
| L-glutamine                                                  |                          |             |          | Thermo Fisher Scientific            | Cat #25030024                    |
| Lipofectamine 3000                                           |                          |             |          | Thermo Fisher Scientific            | Cat #L3000015                    |
| Lymphocyte separation medium 1077                            |                          |             |          | PromoCell                           | Cat #C-44010                     |
| Matrigel Basement Membrane Matrix                            |                          |             |          | Corning                             | Cat #CLS356234                   |

|                                                                         |                                                                                 |                                                                                                   |
|-------------------------------------------------------------------------|---------------------------------------------------------------------------------|---------------------------------------------------------------------------------------------------|
| MEM Alpha Modification                                                  | Cytivia                                                                         | Cat #SH30265.01                                                                                   |
| PBS pH 7.4                                                              | Thermo Fisher Scientific                                                        | Cat #AM9624                                                                                       |
| Penicillin Streptomycin                                                 | Thermo Fisher Scientific                                                        | Cat #15-1440-122                                                                                  |
| ProLong Diamond Antifade Mountant                                       | Thermo Fisher Scientific                                                        | Cat #P36961                                                                                       |
| Proteinase inhibitor cocktail                                           | Sigma-Aldrich                                                                   | Cat #P8340                                                                                        |
| RBC lysis buffer                                                        | BD Pharm Lyse                                                                   | Cat #555899                                                                                       |
| Recombinant Human EPO- $\alpha$                                         | ImmunoTools                                                                     | Cat #11344795                                                                                     |
| Recombinant Human Flt3-Ligand (Flt3L)                                   | PreproTech                                                                      | Cat #300-19                                                                                       |
| Recombinant Human IGF-1 long range                                      | Sigma-Aldrich                                                                   | Cat #I-1271                                                                                       |
| Recombinant Human IL-3                                                  | ImmunoTools                                                                     | Cat #11340037                                                                                     |
| Recombinant Murine stem cell factor (SCF)                               | PreproTech                                                                      | Cat #250-03                                                                                       |
| Recombinant Murine thrombopoietin (TPO)                                 | PreproTech                                                                      | Cat #315-14                                                                                       |
| RetroNectin                                                             | Takara Bio                                                                      | Cat #T100B                                                                                        |
| RevitaCell Supplement                                                   | Gibco                                                                           | Cat #A2644501                                                                                     |
| RNase A                                                                 | Roche                                                                           | Cat #10109142001                                                                                  |
| RPMI 1640                                                               | Thermo Fisher Scientific                                                        | Cat #31870074                                                                                     |
| STEMdiff APEL2 Medium                                                   | STEMCELL Technologies                                                           | Cat #05275                                                                                        |
| StemFlex Medium                                                         | Gibco                                                                           | Cat #A3349401                                                                                     |
| StemSpan SFEM                                                           | STEMCELL Technologies                                                           | Cat #09650                                                                                        |
| Tamoxifen                                                               | Merck                                                                           | Cat #T5648-1G                                                                                     |
| TransIT-LT1 Transfection Reagent                                        | MoBiTec                                                                         | Cat #MIR2300                                                                                      |
| UltraComp eBeads™ Plus Compensation Beads                               | Thermo Fisher Scientific                                                        | Cat #01-3333-42                                                                                   |
| UltraPure 0.5 M EDTA, pH 8.0                                            | Thermo Fisher Scientific                                                        | Cat #15-575-020                                                                                   |
| Y-27632 dihydrochloride                                                 | abcam                                                                           | Cat #ab120129                                                                                     |
| Critical commercial assays                                              |                                                                                 |                                                                                                   |
| Applied Biosystems Fast SYBR Green Master Mix                           | Thermo Fisher Scientific                                                        | Cat #4385618                                                                                      |
| Avidin/Biotin Blocking Kit                                              | Vector Laboratories                                                             | Cat #SP-2001                                                                                      |
| Chromium GEM-X Single Cell 3' Chip Kit (v4)                             | 10x Genomics                                                                    | Cat #PN-1000690                                                                                   |
| Chromium GEM-X Single Cell 3' Kit (v4)                                  | 10x Genomics                                                                    | Cat #PN-1000691                                                                                   |
| Chromium Gem-X Single Cell 3' Reagent Kits (v4)                         | 10x Genomics                                                                    | Cat #PN-CG000731, Rev B                                                                           |
| Chromium Next GEM Single Cell 3' (Dual Index) User Guide (v3.3)         | 10x Genomics                                                                    | Cat#CG000315, Rev C                                                                               |
| Chromium Next GEM Single Cell 3' Reagent Kits (v3.3)                    | 10x Genomics                                                                    | Cat#PN-1000268                                                                                    |
| Chromium Next GEM Chip G Single Cell Kit (v3.3)                         | 10x Genomics                                                                    | Cat#PN-1000127                                                                                    |
| DAB (3,3'-diaminobenzidine) Peroxidase (HRP) Substrate Kit, With Nickel | Vector Laboratories                                                             | Cat #SK-4100                                                                                      |
| Dual Index Kit TT Set A (v3.3)                                          | 10x Genomics                                                                    | Cat#PN-1000215                                                                                    |
| Dual Index Plate TT Set A (v4)                                          | 10x Genomics                                                                    | Cat #PN-3000431                                                                                   |
| High-Capacity cDNA Reverse Transcription Kit with Rnase Inhibitor       | Thermo Fisher Scientific                                                        | Cat #4374966                                                                                      |
| Mouse S1000A8/S100A9 Heterodimer DuoSet ELISA                           | R&D Systems                                                                     | Cat #DY8596-05                                                                                    |
| NucleoBond Xtra Maxi Plus 50                                            | Takara Bio                                                                      | Cat #740416.50                                                                                    |
| Reticulin Silver Plating Kit acc. To Gordon & Sweets                    | Sigma-Aldrich                                                                   | Cat #1002510001                                                                                   |
| True-Nuclear Transcription factor Buffer Set                            | BioLegend                                                                       | Cat #424401                                                                                       |
| VECTASTAIN ELITE ABC HRP Detection Kit                                  | Vector Laboratories                                                             | Cat #PK-6100                                                                                      |
| Experimental models: Cell Lines                                         |                                                                                 |                                                                                                   |
| HEK293T                                                                 | ATCC                                                                            | CRL-323216, RRID:CVCL_0063                                                                        |
| Experimental Models: Organisms/Strains                                  |                                                                                 |                                                                                                   |
| B6.Cg-Gi(ROSA)26Sortm9(CAG-tdTomato)Hze/J <i>Mus musculus</i>           | The Jackson Laboratory                                                          | Strain#007909; RRID:IMSR_JAX:007909                                                               |
| B6.SJL-PtprcaPepcb/BoyCr1 <i>Mus musculus</i>                           | Charles River                                                                   | Strain#564; RRID:IMSR_CRL:564                                                                     |
| C57BL/6 <i>Mus musculus</i>                                             | The Jackson Laboratory                                                          | Strain#000664; RRID:IMSR_JAX:000664                                                               |
| <i>Escherichia coli</i> DH5a Bacterial strain                           | New England Biolabs                                                             | Cat #C2987H                                                                                       |
| Gli1tm3(cre/ERT2)Alj/J <i>Mus musculus</i>                              | The Jackson Laboratory                                                          | Strain#007913; RRID:IMSR_JAX:007913                                                               |
| B6/J-(ICSBP)tm                                                          | Holtshcke et al., Cell, 1996                                                    | N/A                                                                                               |
| Recombinant DNA                                                         |                                                                                 |                                                                                                   |
| IRF8-ERT2 MIEG3                                                         | derived from MIEG3, PMID: 10961859, gift from Maja Milanovic and Dirk Castanjen | N/A                                                                                               |
| pMIG                                                                    | William Hahn                                                                    | Cat #9044, RRID: Addgene_9044                                                                     |
| pMIG-BCR-ABL                                                            | derived from Addgene, Cat #9044                                                 | N/A                                                                                               |
| pCL-Eco (retroviral packaging)                                          | Inder Verma                                                                     | Addgene Cat #12371, RRID: Addgene_12371                                                           |
| pVpack-Eco (retroviral packaging)                                       | Stratagene                                                                      | Cat #217596                                                                                       |
| pV-pack-GP (retroviral packaging)                                       | Stratagene                                                                      | Cat #217566                                                                                       |
| Deposited data                                                          |                                                                                 |                                                                                                   |
| Analyzed data                                                           | This paper                                                                      |                                                                                                   |
| cDC2 IRF8 ChIP sequencing data                                          | Xu et al., eLife, 2024                                                          | GSE: GSE198651                                                                                    |
| Genome Reference Consortium Mouse Build 38 patch release 6, mouse mm10  | Genome Reference Consortium                                                     | GCF_000001635.20                                                                                  |
| Raw data                                                                | This paper                                                                      |                                                                                                   |
| Software and algorithms                                                 |                                                                                 |                                                                                                   |
| RESOURCE                                                                | SOURCE                                                                          | IDENTIFIER                                                                                        |
| Augur                                                                   | Github, neurorestore/Augur                                                      | <a href="https://doi.org/10.1038/s41587-020-0605-1">https://doi.org/10.1038/s41587-020-0605-1</a> |

|                                                                 |                                          |                                                                                                                                               |
|-----------------------------------------------------------------|------------------------------------------|-----------------------------------------------------------------------------------------------------------------------------------------------|
| Cell Ranger (dataset 1: v7.1.0, dataset 2: v9.0.1)              | 10x Genomics                             | <a href="https://www.10xgenomics.com/support/software/cell-ranger/latest">https://www.10xgenomics.com/support/software/cell-ranger/latest</a> |
| CrossTalkR (v2.0)                                               | GitHub, CostaLab/CrossTalkR              | <a href="https://doi.org/10.1093/bioinformatics/btab370">https://doi.org/10.1093/bioinformatics/btab370</a>                                   |
| decontX (v1.6.0)                                                | GitHub, campbio/decontX                  | <a href="https://doi.org/10.1186/s13059-020-1950-6">https://doi.org/10.1186/s13059-020-1950-6</a>                                             |
| decoupleR (v.2.0.6 and v2.9.7)                                  | GitHub, Saezlab/decoupleR                | <a href="https://doi.org/10.1093/bioadv/vbac016">https://doi.org/10.1093/bioadv/vbac016</a>                                                   |
| DoRotheA                                                        | GitHub, Saezlab/DoRotheA                 | <a href="https://doi.org/10.1101/gr.240663.118">https://doi.org/10.1101/gr.240663.118</a>                                                     |
| FlowJo 10.9.0 (FlowJo Engine version 5.0000, BD Biosciences)    | Becton Dickison & Company (BD) 2006-2023 | <a href="https://www.flowjo.com">https://www.flowjo.com</a>                                                                                   |
| ImageJ (v2.3.0)                                                 | ImageJ2 2010-2023                        | <a href="https://imagej.net">https://imagej.net</a>                                                                                           |
| Integrative Genomics Viewer (Version 2.19.7)                    |                                          | <a href="https://igv.org">https://igv.org</a>                                                                                                 |
| matplotlib                                                      |                                          | <a href="https://matplotlib.org">https://matplotlib.org</a>                                                                                   |
| Omnipath (v3.7)                                                 |                                          | <a href="https://doi.org/10.15252/msb.20209923">https://doi.org/10.15252/msb.20209923</a>                                                     |
| Qupath (v0.5.0)                                                 |                                          | <a href="https://doi.org/10.1038/s41598-017-17204-5">https://doi.org/10.1038/s41598-017-17204-5</a>                                           |
| R (v 4.3.2)                                                     | CRAN                                     | <a href="https://www.R-project.org">https://www.R-project.org</a>                                                                             |
| Seurat (v. 3.2.3 and v. 5.3.0)                                  | GitHub, Satijalab/Seurat                 | <a href="https://satijalab.org/seurat/">https://satijalab.org/seurat/</a>                                                                     |
| SCRAN (v.1.34.0)                                                | GitHub, elswob/SCRAN                     | <a href="https://doi.org/doi:10.12688/f1000research.9501.2">https://doi.org/doi:10.12688/f1000research.9501.2</a>                             |
| Other                                                           |                                          |                                                                                                                                               |
| Dako Pen                                                        | Agilent Technologies                     | Cat #S200230-2                                                                                                                                |
| Diagenode Bioruptor Microtubes                                  | Diagenode                                | Cat #C30010011                                                                                                                                |
| LS Columns                                                      | Miltenyi Biotec                          | Cat #130-042-401                                                                                                                              |
| Sakura Tissue-Tek Cryomold Embedding Dish Biopsy 10 x 10 x 5 mm | Weckert Labortechnik                     | Cat #4565                                                                                                                                     |
| Optimal cutting temperature compound (OCT)                      | Weckert Labortechnik                     | Cat #600001                                                                                                                                   |
